# Supplementary material for: Dissection of Ire1 Functions Reveals Stress Response Mechanisms Uniquely Evolved in Candida glabrata
Source: PLoS Pathog. 2013 Jan 31;9(1):e1003160. doi: 10.1371/journal.ppat.1003160 (PMC3561209; doi:10.1371/journal.ppat.1003160)
Supplement: Table S2 — List of genes whose expression levels were altered by tunicamycin treatment for 3 h. (XLSX) [file ppat.1003160.s008.xlsx]

## Sheet: WT2_3h
Table S2. List of genes whose expressions were altered by TM treatment (3h)
Gene ID	Entrez Gene ID	Gene name	S. cereviisae orthologue	Description	Fold Change
					wild type	Dcnb1	Dcrz1	Dslt2	Dire1
CAGL0D00858g	2887176		RPS29B	Ortholog(s) have structural constituent of ribosome activity and cytosolic small ribosomal subunit, nucleus localization	-2.29563	1.22175	-1.4132	1.25172	1.01516
CAGL0C01243g	2886805		HIS5	Ortholog(s) have histidinol-phosphate transaminase activity, role in histidine biosynthetic process, response to nickel cation and cytosol, nucleus localization	-2.6654	-1.35914	-1.58277	-4.79188	-4.08583
CAGL0D06402g	2887059	MET15	MET17	O-acetyl homoserine sulfhydrylase (OAHSH), ortholog of S. cerevisiae MET17; required for utilization of inorganic sulfate as sulfur source; able to utilize cystine as a sulfur source while S. cerevisiae met15 mutants are unable to do so	-2.19251	-1.92585	-1.97393	-7.02797	-5.4571
CAGL0F01463g	2887624	TIR1	TIR2	Putative GPI-linked cell wall mannoprotein of the Srp1p/Tip1p family	-2.4625	-1.97829	-1.82231	-6.85057	-4.5144
CAGL0A02233g	2886373		HXT6	Ortholog(s) have glucose transmembrane transporter activity and mitochondrion, plasma membrane, plasma membrane enriched fraction localization	-5.35541	-8.36283	-2.7816	-6.42451	-3.14434
CAGL0A02112g	2886304		DED81	Ortholog(s) have asparagine-tRNA ligase activity, role in asparaginyl-tRNA aminoacylation and cytosol localization	-3.8903	-1.2275	-1.54467	-1.49498	-2.44673
CAGL0C01573g	2886947		ARO4	Ortholog(s) have 3-deoxy-7-phosphoheptulonate synthase activity, role in aromatic amino acid family biosynthetic process and cytosol, nucleus localization	-4.31308	-1.24446	-1.96834	-2.11853	-2.71247
CAGL0F08459g	2887794		MES1	Ortholog(s) have methionine-tRNA ligase activity, role in methionyl-tRNA aminoacylation and cytosol, methionyl glutamyl tRNA synthetase complex localization	-2.85725	-1.08469	-1.38746	-1.27447	-1.74553
CAGL0A02090g	2886340		YHR020W	Ortholog(s) have role in chromosome organization and cytosol, ribosome, soluble fraction localization	-3.74201	-1.23187	-1.86729	-1.67884	-2.40198
CAGL0M12881g	2891454			Ortholog(s) have dihydroorotate oxidase activity, role in 'de novo' pyrimidine base biosynthetic process, oxidation-reduction process and mitochondrion localization	-3.30566	-1.16887	-1.73143	-1.53825	-2.18976
CAGL0D00176g	2887084		GDH3	Ortholog(s) have glutamate dehydrogenase (NADP+) activity, role in glutamate biosynthetic process and cytosol, mitochondrion, nucleus, soluble fraction localization	-2.79475	-1.19289	-1.2001	-1.21115	-1.54387
CAGL0I01430g	2888956		ANB1	Ortholog(s) have cytosol, nucleolus localization	-3.11691	-1.02668	-1.33286	-1.10997	-1.58759
CAGL0C02189g	2886930	SAH1	SAH1	Ortholog(s) have cytosol localization	-4.99386	-1.956	-1.76739	-2.09782	-3.56505
CAGL0B02717g	2886546		ACS2	Ortholog(s) have acetate-CoA ligase activity, acid-ammonia (or amide) ligase activity, role in acetyl-CoA biosynthetic process, histone acetylation, replicative cell aging and cytosol, nucleolus, soluble fraction localization	-2.22064	-1.06883	-1.05196	-1.00672	-1.81492
CAGL0I03322g	2889054		ECM10	Ortholog(s) have role in protein refolding, protein targeting to mitochondrion and mitochondrial nucleoid localization	-4.13704	-1.91896	-1.73798	-1.86478	-3.5528
CAGL0G09581g	2888271		TUF1	Ortholog(s) have GTPase activity, translation elongation factor activity, role in mitochondrial genome maintenance, mitochondrial translation, translational elongation and mitochondrion localization	-2.78632	-1.14883	-1.201	-1.301	-2.13153
CAGL0K05027g	2890501		ADE12	Ortholog(s) have DNA replication origin binding, adenylosuccinate synthase activity, role in cellular response to cadmium ion, purine nucleotide biosynthetic process and cytosol, nucleus localization	-2.62962	-1.19895	-1.46185	-1.09694	-2.36154
CAGL0I07447g	2889221		ITR2	Ortholog(s) have myo-inositol transmembrane transporter activity, role in ascospore formation, conjugation with cellular fusion, myo-inositol transport and Golgi apparatus, fungal-type vacuole membrane, plasma membrane localization	-4.91787	-1.49072	-2.24205	-1.98312	-4.54533
CAGL0F02563g	2887671	HPT1	HPT1	Putative hypoxanthine guanine phosphoribosyl transferase	-3.97917	-1.59262	-2.90965	-1.5829	-2.8125
CAGL0I04752g	2889363		CDS1	Ortholog(s) have phosphatidate cytidylyltransferase activity	-3.20877	-1.38583	-1.97449	-1.27106	-2.32314
CAGL0I06050g	2889369	INO1	INO1	Putative inositol 1-phosphate synthase; regulated by the transcriptional activators Ino2p and Ino4p; protein differentially expressed in azole resistant strain	-4.47561	-1.5911	-3.46066	-2.09844	-4.36637
CAGL0L03289g	2890726		UTH1	Ortholog(s) have role in fungal-type cell wall biogenesis, fungal-type cell wall organization, mitochondrion degradation and cell surface, extracellular region, fungal-type cell wall localization	-4.99497	-1.37873	-2.6887	-3.52016	-3.2371
CAGL0E02013g	2887401		RPL18A	Ortholog(s) have cytosol localization	-3.51837	-1.14448	-2.63321	-1.18409	-1.42036
CAGL0G05027g	2887982		RPS13	Ortholog(s) have SSU rRNA binding, structural constituent of ribosome activity and role in maturation of SSU-rRNA from tricistronic rRNA transcript (SSU-rRNA, 5.8S rRNA, LSU-rRNA)	-3.95922	-1.14709	-2.41024	-1.23034	-1.37599
CAGL0A03278g	2886486		RPL19A	Ortholog(s) have cell surface, cytosol localization	-3.74303	-1.22655	-1.9396	-1.04204	-1.77811
CAGL0F08547g	2887849	EFB1	EFB1	Translation elongation factor eEF1beta; protein abundance decreased in ace2 mutant cells	-3.71023	-1.39106	-1.82859	-1.19247	-1.80022
CAGL0D02090g	2887233	ASC1	ASC1	40S small subunit ribosomal protein	-2.90178	-1.14383	-1.70963	-1.05446	-1.48127
CAGL0H05511g	2888571		RPS9A	Ortholog(s) have rRNA binding, structural constituent of ribosome activity and role in maturation of SSU-rRNA from tricistronic rRNA transcript (SSU-rRNA, 5.8S rRNA, LSU-rRNA)	-3.3092	-1.1243	-1.99767	-1.16569	-1.79315
CAGL0G08173g	2888200		RPS31	Ortholog(s) have protein tag, structural constituent of ribosome activity and role in maturation of SSU-rRNA from tricistronic rRNA transcript (SSU-rRNA, LSU-rRNA,5S), protein ubiquitination, ribosomal small subunit assembly	-3.92022	-1.11761	-1.78301	-1.03311	-1.61167
CAGL0M04873g	2891569		RPS10A	Ortholog(s) have role in rRNA export from nucleus and cell surface, cytosol localization	-3.8767	-1.07411	-2.03655	-1.09898	-1.5518
CAGL0M06501g	2891678		RPS9B	Ortholog(s) have structural constituent of ribosome activity and role in maturation of SSU-rRNA from tricistronic rRNA transcript (SSU-rRNA, 5.8S rRNA, LSU-rRNA), positive regulation of translational fidelity	-4.26501	-1.01971	-2.15065	-1.04022	-1.8627
CAGL0E03289g	2887276		TIF4631	Ortholog(s) have role in ribosomal large subunit biogenesis, stress granule assembly and cytoplasmic stress granule, eukaryotic translation initiation factor 4F complex, mitochondrion localization	-3.7091	-1.74489	-2.01865	-1.31601	-1.58434
CAGL0G09130g	2888043		RPL7B	Ortholog(s) have cytoplasm, nucleolus localization	-2.6733	-1.15355	-1.47412	-1.2685	-1.15825
CAGL0E03938g	2887334		RPL8A	Has domain(s) with predicted role in ribosome biogenesis and ribonucleoprotein complex localization	-2.95791	-1.2655	-1.45539	-1.20124	-1.21339
CAGL0L04840g	2890709		RPS23A	Ortholog(s) have structural constituent of ribosome activity and role in maturation of SSU-rRNA from tricistronic rRNA transcript (SSU-rRNA, 5.8S rRNA, LSU-rRNA), regulation of translational fidelity	-2.82798	-1.1222	-1.41921	-1.12739	-1.06107
CAGL0E03245g	2887274		NSR1	Ortholog(s) have RNA binding, single-stranded DNA binding activity, role in single-species biofilm formation on inanimate substrate and mitochondrion, nucleus localization	-3.72977	-1.56938	-1.6702	-1.23648	-1.2544
CAGL0I00792g	2889042		RPS16A	Ortholog(s) have role in maturation of SSU-rRNA from tricistronic rRNA transcript (SSU-rRNA, 5.8S rRNA, LSU-rRNA) and 90S preribosome, cytosol localization	-3.06776	-1.17972	-1.42705	-1.01256	-1.05773
CAGL0L11462g	2890966		RPL6A	Ortholog(s) have RNA binding, structural constituent of ribosome activity, role in cytoplasmic translation, ribosomal large subunit assembly and cytosolic large ribosomal subunit, nucleolus localization	-3.31326	-1.17956	-1.50248	-1.08404	-1.17089
CAGL0B01122g	2886539	SAM1	SAM1	S-adenosylmethionine synthetase	-7.92576	-1.87699	-3.06283	-1.74526	-3.86367
CAGL0L06886g	2890821		RPL13A	Ortholog(s) have cell surface, cytosol localization	-4.42379	-1.23766	-1.59826	-1.02924	-1.66963
CAGL0D02640g	2886983			Has domain(s) with predicted role in transmembrane transport and integral to membrane localization	-2.06709	-1.80462	-1.8346	-1.37925	-1.63314
CAGL0E02079g	2887399		MSN1	Ortholog(s) have sequence-specific DNA binding activity	-2.22394	-1.70813	-1.71178	-1.60881	-1.50915
CAGL0E03850g	2887279			Ortholog(s) have cytoplasm localization	-2.20393	-1.62588	-1.77644	-1.46927	-1.59746
CAGL0E04554g	2887474			Putative protein; gene is upregulated in azole-resistant strain	-3.52489	-2.52676	-2.92584	-2.57065	-2.9231
CAGL0G09955g	2888141		DPM1	Ortholog(s) have dolichyl-phosphate beta-D-mannosyltransferase activity and role in GPI anchor biosynthetic process, protein N-linked glycosylation, protein O-linked glycosylation	-2.03518	-1.37011	-1.4512	-1.42153	-1.51676
CAGL0A02365g	2886358		SVF1	Ortholog(s) have role in cellular response to oxidative stress and cytosol, nucleus localization	-2.31007	-1.30106	-1.6661	-1.4183	-1.59744
CAGL0D00418g	2887238		YKL187C	Ortholog(s) have mitochondrion localization	-3.01478	-1.45428	-2.1455	-1.85531	-2.16971
CAGL0K01067g	2890155		TOM20	Ortholog(s) have mitochondrion targeting sequence binding, protein channel activity and role in mitochondrial outer membrane translocase complex assembly, protein import into mitochondrial matrix, tRNA import into mitochondrion	-2.30847	-1.21815	-1.59852	-1.23384	-1.76088
CAGL0G08041g	2888238		RLI1	Ortholog(s) have iron ion binding activity, role in ribosomal large subunit biogenesis, ribosomal subunit export from nucleus, translational initiation, translational termination and cytosolic ribosome, nucleus localization	-2.63442	-1.28691	-2.37827	-1.50152	-2.10125
CAGL0D02662g	2887062			Has domain(s) with predicted role in transmembrane transport and integral to membrane localization	-2.28479	-1.42833	-1.88255	-1.29765	-1.6747
CAGL0I02398g	2889380		NMD3	Ortholog(s) have ribosomal large subunit binding activity, role in ribosomal large subunit export from nucleus and cytosol, cytosolic large ribosomal subunit, nucleus localization	-2.14147	-1.34186	-1.85318	-1.28369	-1.69841
CAGL0J01177g	2889855		ABF1	Ortholog(s) have DNA replication origin binding and RNA polymerase II core promoter proximal region sequence-specific DNA binding, more	-2.20752	-1.36972	-2.09393	-1.29814	-1.79401
CAGL0J00649g	2889884		THR1	Ortholog(s) have homoserine kinase activity, role in homoserine metabolic process, threonine biosynthetic process and cytoplasm localization	-2.33687	-1.25322	-1.94715	-1.15016	-1.60559
CAGL0E02255g	2887549		ZEO1	Ortholog(s) have role in fungal-type cell wall organization, response to stress and extrinsic to plasma membrane, mitochondrial outer membrane, plasma membrane enriched fraction localization	-3.93967	-1.7671	-3.36713	-2.2093	-2.57309
CAGL0K12276g	2889978	PHO88	PHO88	Ortholog(s) have role in phosphate ion transport and endoplasmic reticulum, mitochondrion, plasma membrane localization	-2.03455	-1.09528	-1.88652	-1.19962	-1.31707
CAGL0C04389g	2886743		HTB2	Ortholog(s) have replication fork protection complex localization	-2.30184	-1.57861	-2.06515	-1.26145	-2.15747
CAGL0G08734g	2888092		RPL9B	Ortholog(s) have structural constituent of ribosome activity, role in cytoplasmic translation and cytosolic large ribosomal subunit, nucleus localization	-2.33823	-1.44531	-1.61183	-1.01702	-1.76128
CAGL0L02013g	2890679		IXR1	Ortholog(s) have damaged DNA binding, sequence-specific DNA binding activity, role in DNA repair, cellular response to hypoxia, negative regulation of transcription from RNA polymerase II promoter and nuclear chromatin localization	-2.33448	-1.68496	-1.72009	-1.14372	-1.87026
CAGL0K01551g	2890018		DBP10	Ortholog(s) have role in maturation of 5.8S rRNA from tricistronic rRNA transcript (SSU-rRNA, 5.8S rRNA, LSU-rRNA), maturation of LSU-rRNA from tricistronic rRNA transcript (SSU-rRNA, 5.8S rRNA, LSU-rRNA)	-2.22654	-1.70345	-1.94185	-1.13696	-1.69735
CAGL0F00407g	2887799		LIA1	Ortholog(s) have deoxyhypusine monooxygenase activity	-2.61547	-1.82087	-2.20152	-1.34079	-1.65292
CAGL0E05874g	2887443		BMS1	Ortholog(s) have GTP binding, GTPase activity, U3 snoRNA binding activity, role in cellular response to drug, rRNA processing, ribosome assembly and 90S preribosome, mitochondrion, nucleolus, spindle localization	-2.04261	-1.50279	-1.6997	-1.22176	-1.17594
CAGL0M09977g	2891344		DUS3	Ortholog(s) have role in tRNA modification and cytoplasm, nucleus localization	-2.30368	-1.55392	-1.94997	-1.35549	-1.26629
CAGL0I04730g	2889362	HMT1	HMT1	Putative hnRNP arginine N-methyltransferase	-2.45885	-1.67372	-2.43661	-1.1772	-1.60976
CAGL0H05137g	2888474		ALD6	Ortholog(s) have aldehyde dehydrogenase [NAD(P)+] activity, role in NADPH regeneration, acetate biosynthetic process, response to salt stress and cytosol, mitochondrion localization	-2.9786	-2.24292	-3.18725	-1.37537	-1.73541
CAGL0M13849g	2891237	GAS2	GAS1	Putative glycoside hydrolase of the Gas/Phr family; predicted GPI-anchor	-2.31398	-1.7889	-2.35338	-1.23496	-1.32762
CAGL0G02453g	2888413		PTR2	Ortholog(s) have dipeptide transporter activity, tripeptide transporter activity, role in dipeptide transport, tripeptide transport and fungal-type vacuole, integral to plasma membrane, membrane fraction localization	-2.32935	-1.30019	-1.11218	-1.58069	-1.23921
CAGL0E05390g	2887324	ALA1	ALA1	Ortholog(s) have alanine-tRNA ligase activity, role in alanyl-tRNA aminoacylation and cytosol, mitochondrion localization	-2.58536	-1.35232	-1.40709	-1.19967	-1.32462
CAGL0E00869g	2887433		STM1	Ortholog(s) have telomeric DNA binding, triplex DNA binding activity and role in TOR signaling cascade, anti-apoptosis, regulation of translational initiation in response to stress, telomere maintenance, translational elongation	-2.0159	-1.11205	-1.13373	-1.07959	-1.09494
CAGL0G00990g	2888316	RPP0	RPP0	Acidic ribosomal protein L10	-2.42548	-1.39424	-1.26597	-1.27249	-1.27012
CAGL0D00198g	2887040		BDH1	Ortholog(s) have (R,R)-butanediol dehydrogenase activity, role in butanediol biosynthetic process and cytoplasm localization	-2.03912	-1.23436	-1.33149	-1.17496	-1.21924
CAGL0G03443g	2888192		KAP123	Ortholog(s) have nuclear localization sequence binding, protein transporter activity and role in NLS-bearing substrate import into nucleus, regulation of pseudohyphal growth, ribosomal protein import into nucleus	-3.19182	-1.62187	-1.98515	-1.85939	-1.7924
CAGL0L11792g	2890944		PAB1	Ortholog(s) have poly(A) RNA binding activity and role in mRNA export from nucleus, regulation of nuclear-transcribed mRNA poly(A) tail shortening, regulation of translational initiation	-2.15424	-1.10407	-1.2811	-1.08856	-1.22214
CAGL0F04719g	2887785		GSY2	Ortholog(s) have glycogen (starch) synthase activity, role in glycogen biosynthetic process and cytoplasm localization	-3.14875	-1.62909	-1.68757	-1.91625	-1.74552
CAGL0E03157g	2887404	CYS4	CYS4	Ortholog(s) have cystathionine beta-synthase activity	-2.0217	-1.03284	-1.20095	-1.33347	-1.11942
CAGL0J10164g	2889412	RPL16A	RPL16B	Putative ribosomal protein	-2.27093	-1.1685	-1.27486	-1.43198	-1.13381
CAGL0D03718g	2887184	TIF5	TIF5	Translation initiation factor eIF5	-2.45927	-1.55322	-1.46239	-1.42868	-1.22111
CAGL0L02915g	2890837		DED1	Ortholog(s) have ATP-dependent RNA helicase activity, RNA strand annealing activity	-3.78241	-2.00728	-2.18546	-2.18717	-1.64789
CAGL0B00792g	2886602		SRO9	Ortholog(s) have RNA binding activity, role in cytoplasmic translation and polysome localization	-2.16214	-1.46607	-1.25825	-1.02268	-1.23326
CAGL0H04653g	2888522	ERG6	ERG6	C24 sterol methyltransferase; mutation confers resistance to amphotericin B and nystatin and increased sensitivity to azoles	-3.29666	-2.16987	-1.80572	-1.29914	-1.76846
CAGL0B03795g	2886561		SUI2	Ortholog(s) have role in mitotic cell cycle G1/S transition checkpoint, regulation of translational initiation in response to osmotic stress	-2.07645	-1.48959	-1.42519	-1.11076	-1.33893
CAGL0H10604g	2888479	PUB1	PUB1	Putative major polyadenylated RNA-binding protein of nucleus and cytoplasm; protein abundance decreased in ace2 mutant cells	-2.49167	-1.75756	-1.70269	-1.1542	-1.42937
CAGL0I04356g	2889047	TIF1	TIF2	Translation initiation factor eIF4A	-2.02818	-1.40281	-1.28612	-1.05761	-1.06518
CAGL0H09064g	2888801	FUR1	FUR1	Putative uracil phosphoribosyltransferase	-2.85684	-1.79091	-1.84613	-1.51612	-1.5924
CAGL0J10032g	2889431		NOP2	Ortholog(s) have nucleus, preribosome, large subunit precursor localization	-2.25377	-1.47014	-1.52533	-1.19895	-1.19084
CAGL0K02541g	2890262		PRS3	Ortholog(s) have ribose phosphate diphosphokinase activity, role in 5-phosphoribose 1-diphosphate biosynthetic process, cellular response to drug, fungal-type cell wall organization, regulation of cell size and cytoplasm localization	-2.49882	-1.18591	-1.62259	-1.13333	-1.41043
CAGL0J05984g	2889775		AAH1	Ortholog(s) have adenine deaminase activity, role in adenine catabolic process, hypoxanthine salvage and cytosol, nucleus localization	-2.60042	-1.44072	-1.84513	-1.30084	-1.32645
CAGL0J10384g	2889601		RPL28	Ortholog(s) have RNA binding activity and mitochondrion, nucleus localization	-2.54175	-1.42159	-1.82421	-1.1006	-1.40051
CAGL0M02497g	2891463		RPL33A	Ortholog(s) have structural constituent of ribosome activity, role in cytoplasmic translation and cytosolic large ribosomal subunit localization	-2.68109	-1.34096	-1.80542	-1.00622	-1.27666
CAGL0F00363g	2887699	OPI3	OPI3	Ortholog(s) have phosphatidyl-N-dimethylethanolamine N-methyltransferase activity, phosphatidyl-N-methylethanolamine N-methyltransferase activity and role in phosphatidylcholine biosynthetic process	-2.51862	-1.78678	-2.56117	-2.27909	-3.1939
CAGL0G02189g	2888286	MTD1	MTD1	Putative methylenetetrahydrofolate dehydrogenase (NAD+); protein abundance increased in ace2 mutant cells	-2.25587	-1.87273	-2.66371	-2.58058	-3.81031
CAGL0F08503g	2887571		FOL2	Ortholog(s) have GTP cyclohydrolase I activity, role in folic acid-containing compound biosynthetic process and cytosol, nucleus localization	-2.60799	-1.22023	-2.62056	-2.77936	-2.4778
CAGL0C04136g	2886845		HHF1	Ortholog(s) have role in histone H3-K79 methylation, sexual sporulation resulting in formation of a cellular spore and replication fork protection complex localization	-2.47993	-1.71764	-2.75039	-1.87402	-2.28385
CAGL0H09834g	2888694			Ortholog(s) have nucleus localization	-2.06112	-1.70285	-2.69534	-1.92046	-2.49206
CAGL0E00737g	2887455		HMO1	Ortholog(s) have DNA binding, bending, double-stranded DNA binding, four-way junction DNA binding, sequence-specific DNA binding activity	-2.11501	-1.38603	-2.07677	-1.73959	-1.93143
CAGL0A01221g	2886289			Has domain(s) with predicted role in transmembrane transport and integral to membrane localization	-2.05918	-1.33222	-2.02179	-1.97636	-2.04545
CAGL0K07480g	2890378	PGM1	PGM1	Putative phosphoglucomutase	-2.46278	-1.66969	-2.58016	-2.27981	-2.58829
CAGL0I03080g	2889164	URA3	URA3	Orotidine 5'-phosphate decarboxylase, catalyzes a step in pyrimidine biosynthesis; protein abundance decreased in ace2 mutant cells	-2.04731	-1.41454	-1.89429	-1.85445	-1.93351
CAGL0J02948g	2889742	FCY2	FCY22	Purine-cytosine transporter	-2.47139	-2.19546	-2.60564	-2.22647	-2.58646
CAGL0C04411g	2886776		HTA2	Ortholog(s) have role in DNA repair and replication fork protection complex localization	-3.29698	-2.23949	-3.98974	-3.08545	-2.25899
CAGL0H09856g	2888834			Ortholog(s) have role in chromatin silencing at centromere, response to DNA damage stimulus and nucleus localization	-2.16162	-1.82699	-3.03908	-1.9042	-1.92581
CAGL0K11440g	2890072		HTA1	Ortholog(s) have role in DNA damage induced protein phosphorylation, DNA repair, negative regulation of transcription from RNA polymerase II promoter, protein localization to kinetochore, signal transduction in response to DNA damage	-2.72142	-1.92425	-4.08873	-2.21106	-2.86252
CAGL0A01650g	2886480			Putative protein; gene is upregulated in azole-resistant strain	-2.06444	-2.01106	-1.29534	-2.72064	-2.29209
CAGL0F04895g	2887861		GPH1	Ortholog(s) have glycogen phosphorylase activity, role in glycogen catabolic process and cell surface, cytoplasm, hyphal cell wall localization	-2.63096	-2.44974	-1.50222	-2.95662	-2.90788
CAGL0F05115g	2887641		YLR413W	Ortholog of S. cerevisiae : YLR413W	-2.63187	-2.38115	-1.70792	-2.85611	-2.75145
CAGL0F02431g	2887762		ACO2	Ortholog(s) have mitochondrion localization	-2.34379	-2.01127	-1.4119	-2.90746	-2.81811
CAGL0F06413g	2887784		FET3	Ortholog(s) have ferroxidase activity, iron ion transmembrane transporter activity and role in ferrous iron import, high-affinity iron ion transport, iron assimilation by reduction and transport, response to copper ion	-2.05217	-1.96202	-1.05369	-2.1417	-1.87549
CAGL0G08085g	2888240		DNF2	Ortholog(s) have phospholipid-translocating ATPase activity and role in endocytosis, establishment or maintenance of cell polarity, intracellular protein transport, phospholipid translocation	-2.12632	-1.68976	-1.21165	-1.99266	-2.16907
CAGL0K10626g	2890101		GSY1	Ortholog(s) have glycogen (starch) synthase activity, role in glycogen biosynthetic process and mitochondrion localization	-3.54991	-2.67849	-2.00613	-3.20373	-3.77584
CAGL0H05379g	2888664		GCR1	Ortholog(s) have RNA polymerase II core promoter proximal region sequence-specific DNA binding, more	-2.15536	-1.80792	-1.70966	-2.3997	-2.37946
CAGL0E03201g	2887302		CHO2	Ortholog(s) have phosphatidylethanolamine N-methyltransferase activity, role in phosphatidylcholine biosynthetic process and endoplasmic reticulum membrane, microsome localization	-3.61149	-1.89077	-2.64669	-4.04899	-3.91392
CAGL0B00902g	2886505	HIS4	HIS4	Phosphoribosyl-AMP cyclohydrolase; phosphoribosyl-ATP pyrophosphatase; histidinol dehydrogenase	-2.41258	-1.01584	-1.1846	-2.34057	-2.29574
CAGL0G00308g	2888414	SCW4	SCW4	Putative transglycosidase with a predicted role in the modification of 1,3-beta-glucan	-4.85257	-2.04715	-2.62108	-4.25486	-4.95497
CAGL0I04708g	2889361	PDX3	PDX3	Pyridoxamine 5?-phosphate oxidase	-2.41727	-1.29764	-1.17468	-2.25462	-2.13498
CAGL0F07029g	2887607	MET13	MET13	Ortholog(s) have methylenetetrahydrofolate reductase (NADPH) activity, role in methionine biosynthetic process, oxidation-reduction process and cytosol, mitochondrion, nucleus localization	-3.67293	-1.94768	-2.38901	-4.95771	-4.53082
CAGL0G04741g	2888153		LEU4	Ortholog(s) have 2-isopropylmalate synthase activity, role in cellular response to drug, leucine biosynthetic process and mitochondrion localization	-2.59497	-1.47457	-1.25348	-3.20271	-2.70677
CAGL0J01441g	2889843		ADH3	Ortholog(s) have alcohol dehydrogenase (NAD) activity, role in NADH oxidation, amino acid catabolic process to alcohol via Ehrlich pathway and mitochondrial matrix, soluble fraction localization	-2.79406	-1.47679	-1.55297	-2.8449	-3.7649
CAGL0L00429g	2891113		GCV2	Ortholog(s) have glycine dehydrogenase (decarboxylating) activity, role in glycine decarboxylation via glycine cleavage system, one-carbon metabolic process and mitochondrion localization	-2.99924	-1.82842	-2.0611	-4.30009	-4.86856
CAGL0B03993g	2886651		ILV3	Ortholog(s) have dihydroxy-acid dehydratase activity, role in branched chain family amino acid biosynthetic process and mitochondrion localization	-3.16786	-1.09611	-1.57078	-1.91563	-2.35721
CAGL0A04829g	2886356		HXK1	Putative hexokinase isoenzyme 2; protein differentially expressed in azole resistant strain	-2.94544	-1.3878	-1.27927	-2.14869	-2.26821
CAGL0B03047g	2886604	ILV5	ILV5	Ketol-acid reducto-isomerase; mass spectrometry data indicates this gene is likely to be protein-coding	-3.57637	-1.67623	-1.34169	-2.54444	-2.36408
CAGL0A04059g	2886412	NMT1	NMT1	Myristoyl-CoA, protein N-myristoyltransferase	-2.68732	-1.14271	-1.11973	-1.62255	-1.81107
CAGL0H03399g	2888497		HNM1	Ortholog(s) have choline transmembrane transporter activity, ethanolamine transmembrane transporter activity and role in choline transport, ethanolamine transport, glycine betaine transport	-3.18755	-1.33994	-1.2634	-1.9732	-2.35084
CAGL0E05016g	2887374		ARO2	Ortholog(s) have chorismate synthase activity, riboflavin reductase (NADPH) activity, role in aromatic amino acid family biosynthetic process and cytosol, nucleus, soluble fraction localization	-3.34674	-1.69509	-1.75335	-2.46097	-2.31572
CAGL0C03069g	2886782		CHO1	Ortholog(s) have CDP-diacylglycerol-serine O-phosphatidyltransferase activity	-2.34771	-1.41386	-1.54145	-1.76275	-2.43861
CAGL0E01353g	2887499			Putative high-affinity zinc transporter; gene is downregulated in azole-resistant strain	-3.14043	-1.71832	-1.90405	-2.33341	-2.85395
CAGL0K03267g	2890167	OPI1	OPI1	Putative transcriptional regulator with a role in de novo inositol biosynthesis; essential gene	-2.8135	-1.46874	-1.9339	-1.84158	-2.57817
CAGL0K04499g	2890000		ADE6	Ortholog(s) have role in purine nucleotide biosynthetic process and Golgi apparatus localization	-3.51398	-1.94215	-2.23828	-2.23611	-3.62206
CAGL0H03905g	2888632		ILV6	Ortholog(s) have acetolactate synthase activity, enzyme regulator activity, role in branched chain family amino acid biosynthetic process and acetolactate synthase complex, mitochondrial nucleoid localization	-2.53159	-1.11189	-1.39443	-1.73767	-2.31646
CAGL0L05676g	2890801		URA2	Ortholog(s) have GMP synthase (glutamine-hydrolyzing) activity, aspartate carbamoyltransferase activity, carbamoyl-phosphate synthase (glutamine-hydrolyzing) activity, dihydroorotase activity	-2.8511	-1.34586	-1.45231	-1.86686	-2.68394
CAGL0G03091g	2888362		VAS1	Ortholog(s) have valine-tRNA ligase activity, role in valyl-tRNA aminoacylation and cytosol, mitochondrion localization	-2.61844	-1.53989	-1.42471	-1.7073	-2.1911
CAGL0D06688g	2887157	ALD4	ALD4	Ortholog(s) have aldehyde dehydrogenase (NAD) activity, aldehyde dehydrogenase [NAD(P)+] activity and role in NADPH regeneration, acetate biosynthetic process, ethanol metabolic process, pyruvate metabolic process	-2.45267	-1.51804	-1.25924	-1.46248	-2.1247
CAGL0M03377g	2891502		GLC3	Ortholog(s) have 1,4-alpha-glucan branching enzyme activity, role in glycogen biosynthetic process and cytoplasm localization	-2.82023	-1.8005	-1.42365	-1.77968	-2.31304
CAGL0G03311g	2888027		ILS1	Ortholog(s) have isoleucine-tRNA ligase activity, role in isoleucyl-tRNA aminoacylation and cytosol localization	-2.25669	-1.18065	-1.22105	-1.1769	-1.86339
CAGL0H06369g	2888813	CYS3	CYS3	Ortholog(s) have cystathionine gamma-lyase activity, role in cysteine biosynthetic process via cystathionine, transsulfuration and cytoplasm localization	-2.41973	-1.1566	-1.30627	-1.48404	-1.89455
CAGL0K06787g	2890406		PYC2	Ortholog(s) have pyruvate carboxylase activity, role in gluconeogenesis and cytosol localization	-2.76954	-1.31542	-1.35769	-1.67485	-2.23737
CAGL0A01430g	2886466	TRP5	TRP5	Putative tryptophan synthase; protein abundance increased in ace2 mutant cells	-2.51596	-1.35979	-1.70124	-2.12044	-2.13806
CAGL0H04961g	2888525		SEC61	Ortholog(s) have P-P-bond-hydrolysis-driven protein transmembrane transporter activity, peptide transporter activity, signal sequence binding activity	-2.1667	-1.05787	-1.46747	-1.85271	-1.98365
CAGL0A01199g	2886303	DIP5	DIP5	Putative dicarboxylic amino acid permease	-2.12189	-1.14105	-1.53012	-1.57995	-1.79879
CAGL0J11748g	2889464	PLB2	PLB2	Putative phospholipase B; predicted GPI-anchor	-4.64318	-2.59466	-3.51462	-3.67755	-4.20205
CAGL0L08448g	2890619		NCE102	Ortholog(s) have role in eisosome assembly, establishment of protein localization in plasma membrane, negative regulation of protein phosphorylation, protein secretion	-2.58498	-1.73593	-2.03251	-2.42453	-2.5965
CAGL0L12254g	2890691		ALT1	Ortholog(s) have L-alanine:2-oxoglutarate aminotransferase activity, role in alanine biosynthetic process, alanine catabolic process, cellular response to drug and cytosol, mitochondrion, nucleus localization	-2.5323	-1.67594	-1.71797	-2.23161	-2.36681
CAGL0K09328g	2890257	THR4	THR4	Threonine synthase	-2.03306	-1.35564	-1.44626	-1.438	-1.82237
CAGL0L04400g	2890636		YRR1	Ortholog(s) have RNA polymerase II core promoter proximal region sequence-specific DNA binding, sequence-specific DNA binding RNA polymerase II transcription factor activity	-2.27309	-1.65145	-1.65648	-1.87063	-2.20037
CAGL0F01749g	2887952		SHM2	Putative serine hydroxymethyltransferase; protein differentially expressed in azole resistant strain	-3.44453	-1.85989	-2.46764	-2.9274	-3.7489
CAGL0L00539g	2891107		ADD37	Ortholog(s) have role in ER-associated protein catabolic process and cytoplasm localization	-2.06701	-1.10879	-1.5719	-1.91937	-2.67272
CAGL0H10142g	2888486	ARO3	ARO3	Putative 2-dehydro-3-deoxyphosphoheptonate aldolase; protein abundance increased in ace2 mutant cells	-2.24336	-1.2917	-1.13575	-1.36829	-1.59895
CAGL0I05566g	2889336		TIM23	Ortholog(s) have mitochondrion targeting sequence binding, protein channel activity, role in protein import into mitochondrial matrix and mitochondrial inner membrane presequence translocase complex, plasma membrane localization	-2.42003	-1.53217	-1.2405	-1.41845	-1.578
CAGL0H02695g	2888809		GLG1	Ortholog(s) have glycogenin glucosyltransferase activity and role in glycogen biosynthetic process	-2.47474	-2.08642	-1.45452	-2.06852	-1.88967
CAGL0I05038g	2889087		PTC2	Ortholog(s) have protein serine/threonine phosphatase activity	-2.12656	-1.62164	-1.45127	-1.84892	-1.65103
CAGL0J03850g	2889659		MGE1	Ortholog(s) have adenyl-nucleotide exchange factor activity, role in protein import into mitochondrial matrix, protein refolding and mitochondrial matrix, presequence translocase-associated import motor localization	-2.1409	-1.37122	-1.30065	-1.58761	-1.61999
CAGL0L12936g	2890581		TOM71	Ortholog(s) have protein transporter activity, role in biological_process and integral to mitochondrial outer membrane localization	-2.09119	-1.52116	-1.33358	-1.56497	-1.5413
CAGL0A02211g	2886382		HXT7	Ortholog(s) have glucose transmembrane transporter activity, pentose transmembrane transporter activity and mitochondrion, plasma membrane, plasma membrane enriched fraction localization	-4.75172	-2.49262	-2.11477	-5.29725	-2.57695
CAGL0B02838g	2886509	MUP1		Has domain(s) with predicted role in amino acid transmembrane transport and membrane localization	-4.46455	-2.60303	-2.65024	-5.32935	-3.56926
CAGL0H00704g	2888656		ICY2	Ortholog(s) have role in mitochondrion degradation	-2.19662	-1.27063	-1.20909	-2.60832	-1.7781
CAGL0F09207g	2887857	BAT1	BAT1	Ortholog(s) have branched-chain-amino-acid transaminase activity, role in branched chain family amino acid biosynthetic process, branched chain family amino acid catabolic process and mitochondrial matrix localization	-2.39946	-1.34057	-1.14305	-3.26872	-2.12557
CAGL0H00572g	2888682		TDA4	Ortholog(s) have endoplasmic reticulum localization	-2.05815	-1.89004	-2.0529	-3.10208	-2.42854
CAGL0M01694g	2891188		MIS1	Ortholog(s) have formate-tetrahydrofolate ligase activity, methenyltetrahydrofolate cyclohydrolase activity, methionyl-tRNA formyltransferase activity, methylenetetrahydrofolate dehydrogenase (NADP+) activity	-2.11357	-1.78173	-2.12003	-2.91553	-2.37585
CAGL0J09944g	2889427		AQR1	Ortholog(s) have drug transmembrane transporter activity, monocarboxylic acid transmembrane transporter activity, role in amino acid export, drug transmembrane transport, monocarboxylic acid transport and plasma membrane localization	-2.14857	-3.2739	-2.3409	-3.88843	-2.7583
CAGL0K04367g	2889994		MUP1	Ortholog(s) have L-methionine secondary active transmembrane transporter activity and role in sulfur amino acid transport	-2.37578	-2.85131	-1.96284	-3.78025	-2.61041
CAGL0L06094g	2890748	STR3	STR3	Putative cystathionine beta-lyase; gene is upregulated in azole-resistant strain	-3.7573	-3.35169	-2.98052	-6.72	-3.81378
CAGL0F03883g	2887679	GAS4	GAS3	Putative glycoside hydrolase of the Gas/Phr family; predicted GPI-anchor	-2.43915	-2.44799	-2.28557	-2.46314	-1.39566
CAGL0H01727g	2888494	EUG1	EUG1	Putative protein disulfide isomerase	-2.09607	-2.13286	-2.06868	-1.86286	-1.19738
CAGL0J10846g	2889512		PCL5	Ortholog(s) have cyclin-dependent protein kinase regulator activity	-2.15382	-1.51787	-2.00505	-2.09115	-1.5246
CAGL0M00154g	2891151	CYN1		Plasma membrane high affinity cystine specific transporter; present only in pathogenic yeasts; confers the ability to utilize cystine as a sulfur source	-2.2895	-1.80466	-1.9054	-1.97172	-1.44532
CAGL0M01826g	2891194	ECM33	ECM33	Ecm33-family protein with a predicted role in cell wall biogenesis and organization; predicted GPI-anchor	-2.19824	-2.17705	-2.98976	-2.18798	-1.06662
CAGL0A04037g	2886378		PWP1	Ortholog(s) have role in rRNA processing and cytosol, nucleolus localization	-2.49776	-2.19114	-1.43899	-1.13626	-1.58019
CAGL0M13893g	2891610		NIP1	Ortholog(s) have translation initiation factor activity and role in cellular response to drug, translational initiation	-2.71098	-2.88051	-1.92844	-1.39833	-1.76348
CAGL0K11462g	2890073		HTB1	Ortholog(s) have DNA binding activity and role in chromatin assembly or disassembly, negative regulation of transcription from RNA polymerase II promoter, postreplication repair	-2.75918	-3.17497	-2.41497	-1.84862	-2.24095
CAGL0K04587g	2890004		RPS22B	Ortholog(s) have structural constituent of ribosome activity and cytosolic small ribosomal subunit, nucleus localization	-2.50914	-3.11982	-1.38227	-1.06156	-1.58054
CAGL0B02794g	2886512		ADE13	Ortholog(s) have N6-(1,2-dicarboxyethyl)AMP AMP-lyase (fumarate-forming) activity, role in 'de novo' IMP biosynthetic process and cytosol, nucleus, soluble fraction localization	-3.83114	-1.90549	-3.32566	-2.22938	-6.75193
CAGL0L08184g	2890559		FEN1	Ortholog(s) have fatty acid elongase activity, role in fatty acid elongation, sphingolipid biosynthetic process, vesicle-mediated transport and endoplasmic reticulum localization	-3.15296	-1.58322	-1.96063	-1.55867	-4.76736
CAGL0D00528g	2887100		FAS1	Ortholog(s) have 3-hydroxyacyl-[acyl-carrier-protein] dehydratase activity, [acyl-carrier-protein] S-acetyltransferase activity and [acyl-carrier-protein] S-malonyltransferase activity, more	-4.99459	-2.80033	-3.36665	-2.51637	-5.98061
CAGL0K11880g	2889959		MRH1	Ortholog(s) have mitochondrion, plasma membrane, plasma membrane enriched fraction localization	-5.15054	-2.18926	-3.32023	-2.67466	-6.03272
CAGL0L10780g	2891047		HFA1	Ortholog(s) have acetyl-CoA carboxylase activity, role in long-chain fatty acid biosynthetic process, regulation of mitosis and cytosol, fungal-type vacuole membrane, mitochondrion localization	-2.35246	-1.40542	-1.48183	-1.73319	-3.14787
CAGL0H10076g	2888888		YRO2	Ortholog(s) have cellular bud, mitochondrion localization	-9.58151	-2.0184	-1.94226	-7.98381	-9.0853
CAGL0I04994g	2889085	MET6	MET6	5-methyltetrahydropteroyltriglutamate homocysteine methyltransferase; protein abundance increased in ace2 mutant cells	-7.2729	-1.98635	-2.68371	-4.91449	-7.65947
CAGL0I00814g	2889041		RPP1A	Ortholog(s) have structural constituent of ribosome activity and ribosome localization	-3.4882	1.14107	-1.74026	-1.01828	-1.35189
CAGL0I09878g	2889275		FAA1	Ortholog(s) have long-chain fatty acid-CoA ligase activity	-2.26131	1.09715	-1.05942	-1.43136	-2.38133
CAGL0A03117g	2886485		YRA1	Ortholog(s) have RNA binding activity, role in poly(A)+ mRNA export from nucleus, transcription-coupled nucleotide-excision repair and transcription export complex localization	-2.42299	1.01407	-1.5351	-1.36215	-2.10477
CAGL0L12760g	2890609		CAM1	Ortholog(s) have calcium ion binding, phospholipid binding, transcription coactivator activity, role in positive regulation of transcription from RNA polymerase II promoter, ribosome biogenesis and cytosol, nucleus localization	-2.01454	1.09171	-1.31718	-1.04317	-1.53909
CAGL0L12870g	2890578		TMA19	Ortholog(s) have role in cellular response to oxidative stress, cytoplasmic translation and cytosol, mitochondrion, nucleus, ribosome localization	-2.14684	1.00952	-1.34053	-1.04781	-1.37292
CAGL0K03465g	2890176		ILV2	Ortholog(s) have acetolactate synthase activity, flavin adenine dinucleotide binding activity, role in isoleucine biosynthetic process, valine biosynthetic process and acetolactate synthase complex, mitochondrion localization	-2.17704	1.07226	-1.05427	-1.45391	-1.24006
CAGL0H03993g	2888584		CIT1	Ortholog(s) have citrate (Si)-synthase activity, role in citrate metabolic process, tricarboxylic acid cycle and mitochondrion, soluble fraction localization	-2.4654	-1.13979	1.046	-1.78538	-2.00434
CAGL0I05720g	2889343		TOM40	Ortholog(s) have protein channel activity, role in protein import into mitochondrial matrix and mitochondrial outer membrane translocase complex, plasma membrane localization	-2.10877	-1.42567	1.00242	-1.01597	-1.8689
CAGL0F07601g	2887617		CWP2	Putative GPI-linked cell wall protein	-4.05022	-1.07184	1.20821	-2.93658	-5.86785
CAGL0K07788g	2890361		LYS2	Ortholog(s) have L-aminoadipate-semialdehyde dehydrogenase activity, fatty-acyl-CoA binding activity, role in lysine biosynthetic process via aminoadipic acid, oxidation-reduction process and cytosol localization	-2.74681	-1.35331	1.10735	-2.89837	-3.73094
CAGL0G01254g	2888210	ARO8	ARO8	Putative aromatic aminotransferase I	-2.04804	1.04541	1.17678	-1.60447	-1.38858
CAGL0J09240g	2889949	LYS21	LYS21	Homocitrate synthase; protein abundance increased in ace2 mutant cells	-2.73963	1.07513	1.16407	-1.94429	-1.94396
CAGL0F07579g	2887779		CWP1	Putative GPI-linked cell wall protein	-3.07648	1.08517	1.13953	-2.60895	-4.4329
CAGL0L10868g	2891015		FSF1	Ortholog(s) have mitochondrion, plasma membrane localization	-2.16046	1.21693	1.06827	-1.72275	-2.45232
CAGL0J08734g	2889674		PMT2	Ortholog(s) have dolichyl-phosphate-mannose-protein mannosyltransferase activity, protein heterodimerization activity	-2.30399	-2.3504	-1.86569	-2.39398	1.14525
CAGL0L03846g	2890547		DBP2	Ortholog(s) have role in nuclear-transcribed mRNA catabolic process, nonsense-mediated decay, rRNA processing and cytosol, mitochondrion, nucleolus localization	-2.27095	-1.47359	-1.76972	-1.41367	1.08037
CAGL0G01826g	2888415		RPL11A	Ortholog(s) have role in ribosomal large subunit assembly and cytosol localization	-2.42245	-1.11612	-1.22769	1.36333	1.03013
CAGL0A03168g	2886331		RPP2B	60S acidic ribosomal protein	-3.10733	1.10613	-1.24948	1.31328	-1.34084
CAGL0A00979g	2886413		RPL38	Ortholog(s) have cytosol localization	-4.05866	1.0417	-1.54295	1.19971	-1.17402
CAGL0A01540g	2886362		RPL30	Ortholog(s) have pre-mRNA 5'-splice site binding, structural constituent of ribosome activity, role in negative regulation of nuclear mRNA splicing, via spliceosome, rRNA processing and cytosol localization	-3.8565	1.062	-1.63335	1.31124	-1.32233
CAGL0G03575g	2888305		RPL23B	Has domain(s) with predicted structural constituent of ribosome activity, role in translation and ribosome localization; evidence for a extended second exon by 2 amino acids	-3.40447	1.07871	-1.48179	1.0507	-1.182
CAGL0M12408g	2891432		RPL34B	Ortholog(s) have cytosol, nucleolus localization	-3.42677	1.16492	-1.47554	1.09676	-1.41982
CAGL0H08734g	2888745		RPL43A	Ortholog(s) have cytosol localization	-3.7925	1.06039	-1.72766	1.13755	-1.72997
CAGL0A01562g	2886312		RPL24A	Ortholog(s) have RNA binding activity	-2.29079	1.15393	-1.18043	1.02863	-1.08547
CAGL0B01203g	2886683		RPL37A	Ortholog(s) have cytosol localization	-2.44958	1.31343	-1.47998	1.26965	-1.24298
CAGL0G00154g	2888412		ZUO1	Ortholog(s) have role in rRNA processing, regulation of translational fidelity, ribosomal subunit export from nucleus and cytosol, mitochondrion, nucleolus, polysome, ribosome localization	-2.54214	1.07233	-1.46529	1.38217	-1.20776
CAGL0J00737g	2889865		RPS27B	Ortholog(s) have structural constituent of ribosome activity	-2.60539	1.0618	-1.3489	1.29146	-1.17479
CAGL0H08976g	2888728		RPL1B	Ortholog(s) have cytosol localization	-2.261	1.06871	-1.2037	1.02631	-1.26033
CAGL0K02123g	2890336		RPS26B	Ortholog(s) have role in rRNA export from nucleus and cytosol localization	-2.18715	1.06283	-1.30493	1.04023	-1.33318
CAGL0L01353g	2890873		HYP2	Ortholog(s) have ribosome binding, translation elongation factor activity, translation initiation factor activity	-2.76333	1.08448	-1.46288	1.2515	-1.61138
CAGL0K07414g	2890375		RPL20A	Ortholog(s) have cytosol, nucleolus localization	-2.55379	1.03238	-1.40811	1.06638	-1.238
CAGL0K06061g	2890451		RPS28B	Ortholog(s) have structural constituent of ribosome activity	-3.10713	1.04797	-1.85049	1.04328	-1.64213
CAGL0D00616g	2887139		RPL31A	Ortholog(s) have structural constituent of ribosome activity, role in cytoplasmic translation, regulation of translational fidelity and cytosolic large ribosomal subunit localization	-3.2577	-1.05482	-1.37523	1.081	-1.33185
CAGL0J03234g	2889732		RPS24A	Ortholog(s) have role in maturation of SSU-rRNA from tricistronic rRNA transcript (SSU-rRNA, 5.8S rRNA, LSU-rRNA) and cytosol, mitochondrion, nucleolus localization	-3.46934	-1.34339	-1.49034	1.07443	-1.42267
CAGL0F03927g	2887636		GUA1	Ortholog(s) have GMP synthase (glutamine-hydrolyzing) activity, role in GMP biosynthetic process and cytosol, soluble fraction localization	-3.66155	-1.35717	-1.78576	1.19737	-1.30182
CAGL0G07227g	2888173		RPS18B	Ortholog(s) have role in endonucleolytic cleavage in ITS1 to separate SSU-rRNA from 5.8S rRNA and LSU-rRNA from tricistronic rRNA transcript (SSU-rRNA, 5.8S rRNA, LSU-rRNA), rRNA export from nucleus	-3.50897	-1.26664	-1.69409	1.13362	-1.25273
CAGL0K08382g	2890354		RPS21A	Ortholog(s) have structural constituent of ribosome activity	-3.69238	-1.24458	-1.88642	1.00537	-1.37954
CAGL0G02079g	2888296		RPL3	Ortholog(s) have role in ribosomal large subunit assembly and cell surface, cytosol, small-subunit processome localization	-3.77375	-1.05848	-1.70208	1.11746	-1.64414
CAGL0K06149g	2890455		RPS17B	Ortholog(s) have role in ribosomal small subunit assembly and cytosol localization	-3.96897	-1.02576	-1.7756	1.17881	-1.6901
CAGL0K03135g	2890223		RPS20	Ortholog(s) have role in maturation of SSU-rRNA from tricistronic rRNA transcript (SSU-rRNA, 5.8S rRNA, LSU-rRNA) and cytosolic small ribosomal subunit localization	-3.70442	-1.03209	-1.71439	1.30828	-1.15747
CAGL0E04994g	2887373		RPL9A	Ortholog(s) have structural constituent of ribosome activity, role in cytoplasmic translation and cytosolic large ribosomal subunit localization	-3.66204	-1.2643	-2.11142	1.06698	-1.82511
CAGL0H04521g	2888848		RPL32	Ortholog(s) have structural constituent of ribosome activity, role in translation and cytosolic large ribosomal subunit, nucleus localization	-3.36148	-1.04236	-1.8495	1.13762	-1.75256
CAGL0E01991g	2887407		RPS19A	Ortholog(s) have structural constituent of ribosome activity, role in rRNA export from nucleus, ribosomal small subunit biogenesis and cytosolic small ribosomal subunit, nucleus localization	-2.81257	-1.00819	-1.74037	1.09922	-1.3677
CAGL0J11220g	2889490		RPS3	Ortholog(s) have DNA-(apurinic or apyrimidinic site) lyase activity, structural constituent of ribosome activity and role in rRNA export from nucleus	-2.82836	-1.01841	-1.67542	1.21505	-1.50408
CAGL0J07238g	2889575	RPS12	RPS12	40S ribosomal protein S12; protein abundance decreased in ace2 mutant cells	-2.84474	-1.05127	-1.56022	1.05579	-1.3046
CAGL0M06523g	2891679		RPL21A	Ortholog(s) have cytosol localization	-3.11867	-1.06488	-1.444	1.12045	-1.73697
CAGL0G02475g	2888345		RPL40B	Ortholog(s) have role in protein ubiquitination, ribosome biogenesis and cytosol, mitochondrion, nucleolus localization	-2.3411	-1.21103	-1.23014	1.27496	-1.2466
CAGL0G05940g	2888402		RPL42B	Ortholog(s) have cytosol localization	-2.65354	-1.22464	-1.47795	1.21097	-1.15568
CAGL0H03685g	2888607		CBF5	Ortholog(s) have pseudouridine synthase activity, role in box H/ACA snoRNA 3'-end processing, rRNA pseudouridine synthesis, snRNA pseudouridine synthesis and 90S preribosome, box H/ACA snoRNP complex, cytosol localization	-2.227	-1.10412	-1.3091	1.03172	-1.03227
CAGL0E05500g	2887566		RPA190	Ortholog(s) have DNA-directed RNA polymerase activity	-2.78503	-1.48803	-1.61164	1.17831	-1.41652
CAGL0H07249g	2888516	DYS1	DYS1	Putative deoxyhypusine synthase	-2.28227	-1.25753	-1.23756	1.08753	-1.1041
CAGL0K06567g	2890441		RPL27B	Ortholog(s) have cytosol, nucleus localization	-2.30086	-1.08086	-1.20089	1.03271	-1.17644
CAGL0C02343g	2886858		ARB1	Ortholog(s) have ATPase activity, uncoupled activity, role in cellular response to drug, ribosomal small subunit export from nucleus and cytosol, nucleus, ribosome localization	-2.96996	-1.09412	-1.45212	1.32817	-1.12473
CAGL0I03234g	2889170		SNU13	Ortholog(s) have RNA binding activity and role in maturation of SSU-rRNA from tricistronic rRNA transcript (SSU-rRNA, 5.8S rRNA, LSU-rRNA), nuclear mRNA splicing, via spliceosome	-2.85278	-1.20275	-1.53844	1.50148	-1.20588
CAGL0I09790g	2888946		NOP58	Ortholog(s) have role in endonucleolytic cleavage in 5'-ETS of tricistronic rRNA transcript (SSU-rRNA, 5.8S rRNA and LSU-rRNA), more	-2.68667	-1.02701	-1.45024	1.28028	-1.37785
CAGL0G01078g	2888247		RPL26A	Ortholog(s) have RNA binding, structural constituent of ribosome activity, role in cytoplasmic translation and cytosolic large ribosomal subunit, nucleolus localization	-2.45951	-1.16095	-1.07578	1.05289	-1.06646
CAGL0J00165g	2889892		RPS25A	Ortholog(s) have structural constituent of ribosome activity and cytosolic small ribosomal subunit localization	-2.87629	-1.17811	-1.1926	1.12519	-1.22264
CAGL0M10241g	2891356		RPL14A	Ortholog(s) have RNA binding activity and cytosol, nucleus localization	-2.62913	-1.06974	-1.23861	1.04623	-1.13593
CAGL0F07073g	2887640		RPS2	Ortholog(s) have SSU rRNA binding, structural constituent of ribosome activity, role in positive regulation of translational fidelity, rRNA export from nucleus and cytosolic small ribosomal subunit, small-subunit processome localization	-2.33593	-1.14266	-1.34916	1.06184	-1.4224
CAGL0M08118g	2891258		RPL17A	Ortholog(s) have structural constituent of ribosome activity, role in cytoplasmic translation and cytosolic large ribosomal subunit localization	-2.03789	-1.08449	-1.36045	1.00991	-1.19385
CAGL0K11748g	2890530	RPS11B	RPS11A	Protein component of the small (40S) ribosomal subunit; expression upregulated in biofilm vs planktonic cell culture	-2.64112	-1.31651	-1.6773	1.03744	-1.39723
CAGL0K09966g	2890208	PRT1	PRT1	Translation initiation factor eIF3 subunit	-2.38831	-1.11215	-1.70151	1.02079	-1.46157
CAGL0J01848g	2889810		RPA135	Ortholog(s) have DNA-directed RNA polymerase activity, role in transcription of nuclear large rRNA transcript from RNA polymerase I promoter and DNA-directed RNA polymerase I complex localization	-2.95832	-1.46806	-1.90099	1.14448	-1.12897
CAGL0M07722g	2891734		CLU1	Ortholog(s) have role in mitochondrion organization, translational initiation and eukaryotic translation initiation factor 3 complex localization	-2.61921	-1.05881	-1.32815	1.20316	-1.77482
CAGL0K01991g	2890330		NCL1	Ortholog(s) have tRNA (cytosine-5-)-methyltransferase activity, role in tRNA methylation and nucleus localization	-2.94232	-1.82041	-1.22748	1.08537	-1.37954
CAGL0F01705g	2887944	FRS1	FRS1	Putative cytosolic phenylalanyl-tRNA synthetase, alpha subunit	-2.3053	-1.47086	-1.40785	1.03549	-1.24754
CAGL0J02816g	2889736		TPA1	Ortholog(s) have poly(A) RNA binding activity	-2.07891	-1.32839	-1.20606	1.16935	-1.12531
CAGL0L04532g	2890642		GLN4	Ortholog(s) have glutamine-tRNA ligase activity, role in glutaminyl-tRNA aminoacylation and cytosol, mitochondrion localization	-2.17214	-1.60678	-1.51754	1.24083	-1.25093
CAGL0G02409g	2888185		SRP40	Ortholog(s) have nucleolus localization	-2.00614	-1.00772	-1.33752	1.3116	-1.05597
CAGL0L10560g	2891037	PDR13	SSZ1	Protein with a predicted role in pleiotropic drug resistance	-2.07095	-1.28095	-1.28529	1.4343	-1.09388
CAGL0G07106g	2888030	APT1	APT1	Putative adenine phosphoribosyltransferase; protein abundance decreased in ace2 mutant cells	-2.06591	-1.48964	-1.7079	1.03651	-1.14255
CAGL0M04829g	2891567		RRP5	Ortholog(s) have poly(U) RNA binding activity	-2.0012	-1.55561	-1.7858	1.04285	-1.16719
CAGL0M13519g	2891222		HAS1	Ortholog(s) have ATP-dependent RNA helicase activity, RNA binding activity, role in rRNA processing, ribosomal small subunit biogenesis and 90S preribosome, nuclear envelope, nucleolus, preribosome, large subunit precursor localization	-2.4764	-1.42353	-2.03716	1.40022	-1.13729
CAGL0L04510g	2890641		RPS28A	Ortholog(s) have structural constituent of ribosome activity	-2.64053	-1.15788	-2.43227	1.16133	-1.47853
CAGL0C05115g	2886799	ARG1	ARG1	Argininosuccinate synthetase	2.41225	2.10012	4.5174	1.41874	1.92337
CAGL0G09449g	2888038	CRH1	CRH1	Putative glycoside hydrolase; predicted GPI-anchor	2.03202	1.28419	2.12164	4.05867	2.79913
CAGL0D05082g	2886994		UBI4	Ortholog(s) have protein tag activity and role in cell morphogenesis, cellular response to heat, filamentous growth of a population of unicellular organisms, pathogenesis, phenotypic switching, protein ubiquitination	2.31149	1.08407	1.36803	1.07961	1.5173
CAGL0E00803g	2887453		HSP42	Putative small cytosolic stress-induced chaperone; gene is upregulated in azole-resistant strain	3.06383	1.84431	1.98821	1.72672	2.31535
CAGL0D02618g	2887121	PEX11	PEX11	Ortholog(s) have role in fatty acid oxidation, peroxisome fission and endoplasmic reticulum, mitochondrion, peroxisomal membrane localization	2.17476	1.50297	1.11661	1.42512	1.4878
CAGL0C00275g	2886921	HSP31		Putative cysteine protease; protein differentially expressed in azole resistant strain; gene is upregulated in azole-resistant strain	2.15715	1.38804	1.07314	1.13965	1.09694
CAGL0G03289g	2888055	SSA3	SSA4	Heat shock protein of the HSP70 family	2.50476	1.65361	1.31687	1.40799	1.52847
CAGL0E02233g	2887548		PCL1	Ortholog(s) have cyclin-dependent protein kinase regulator activity	2.69583	1.35738	2.4832	1.81289	2.42013
CAGL0E05148g	2887300		AMS1	Ortholog(s) have alpha-mannosidase activity, role in oligosaccharide catabolic process and cytosol, fungal-type vacuole membrane localization	3.74923	1.16814	2.57297	1.86843	2.09742
CAGL0E02409g	2887538		CSI2	Ortholog(s) have cellular bud neck, fungal-type vacuole localization	3.82076	1.02262	2.3558	4.08067	4.25301
CAGL0E03025g	2887390		ECL1	Ortholog of S. cerevisiae : ECL1	2.29351	1.23091	1.80036	2.14822	2.51997
CAGL0G07249g	2888174		YOX1	Ortholog(s) have RNA polymerase II regulatory region sequence-specific DNA binding, RNA polymerase II transcription factor binding transcription factor activity involved in negative regulation of transcription activity	2.11538	1.25238	1.88504	2.07159	2.14875
CAGL0G08954g	2888081		YOL019W	Ortholog(s) have fungal-type vacuole, plasma membrane localization	2.09761	1.13727	1.74573	2.08828	2.19936
CAGL0G00858g	2888169		MID2	Ortholog(s) have transmembrane signaling receptor activity	2.023	1.51576	1.3506	1.89246	2.38391
CAGL0D01474g	2887115		AIM3	ORF, Uncharacterized	2.01623	1.31911	1.57356	1.73353	2.02665
CAGL0K08558g	2890320		GFA1	Ortholog(s) have glutamine-fructose-6-phosphate transaminase (isomerizing) activity	2.03352	1.16056	1.28204	1.72315	2.05314
CAGL0M11660g	2891243		RHR2	ORF, Uncharacterized	2.15331	1.32706	1.41171	1.56924	2.25545
CAGL0F04741g	2887937		CMK2	Ortholog(s) have calmodulin-dependent protein kinase activity, role in activation of bipolar cell growth, protein phosphorylation, regulation of mitotic cell cycle and cytosol, nucleus localization	2.03408	1.13521	1.01553	1.59147	1.49163
CAGL0J09416g	2889931		SNA4	Ortholog(s) have fungal-type vacuole lumen, fungal-type vacuole membrane localization	2.01277	1.04064	1.10482	1.64928	1.5396
CAGL0H06721g	2888620		UBP7	Has domain(s) with predicted ubiquitin thiolesterase activity and role in ubiquitin-dependent protein catabolic process	2.04834	1.24351	1.24284	1.94416	1.68499
CAGL0B03619g	2886653		PRB1	Ortholog(s) have serine-type endopeptidase activity	2.82074	1.27914	1.68637	2.04967	2.20245
CAGL0J11176g	2889488		TDA7	Putative adhesin-like protein	2.64124	1.56088	1.86769	2.07022	2.02161
CAGL0J11506g	2889529		CHS1	Ortholog(s) have chitin synthase activity and role in ascospore wall assembly, ascospore wall chitin biosynthetic process, cytokinesis, completion of separation	2.15694	1.06762	1.60506	1.69725	1.74811
CAGL0K04169g	2890046		KSS1	Ortholog(s) have MAP kinase activity, transcription factor binding activity	2.98869	1.67157	1.67731	2.02683	1.91597
CAGL0F04829g	2887774		PIN3	Ortholog(s) have role in actin cytoskeleton organization and cytoplasm, nucleus localization	4.01071	1.59516	1.64003	2.71985	3.12095
CAGL0K11946g	2889962			ORF, Uncharacterized	3.40013	1.32662	1.44019	2.2406	2.37451
CAGL0K00715g	2890515	RTA1	RTA1	Putative protein involved in 7-aminocholesterol resistance; gene is upregulated in azole-resistant strain	2.39787	1.02641	1.20843	2.03261	1.82182
CAGL0L01705g	2890885		YKL047W	Ortholog(s) have cytoplasm localization	2.41594	1.04816	1.10594	1.89172	1.9448
CAGL0F07513g	2887838		MBR1	Ortholog(s) have role in aerobic respiration	3.02277	1.11913	1.30881	2.51444	2.9315
CAGL0M06457g	2891676		GDT1	Ortholog(s) have Golgi apparatus, endoplasmic reticulum, fungal-type vacuole localization	2.38266	1.06725	1.13209	1.98288	2.39589
CAGL0J04466g	2889638		PUN1	Ortholog(s) have role in fungal-type cell wall organization, protein oligomerization and Golgi apparatus, cell division site, cell tip, cellular bud, membrane raft, plasma membrane localization	3.11732	1.65828	1.29706	2.78477	3.21835
CAGL0M13827g	2891236	FKS3	FKS3	Putative 1,3-beta-d-glucan synthase component	2.92724	1.05145	1.20301	2.03312	3.29245
CAGL0I04510g	2889029		YBR016W	Ortholog(s) have cellular bud membrane, mating projection membrane localization	2.43913	1.26028	1.06904	2.77107	2.25204
CAGL0M03839g	2891523		BXI1	Ortholog(s) have role in apoptotic process, calcium-mediated signaling, endoplasmic reticulum unfolded protein response and Golgi apparatus, endoplasmic reticulum, fungal-type vacuole membrane, mitochondrion localization	2.15458	1.27558	1.18711	2.44857	2.01054
CAGL0I06644g	2889080		SPI1	Putative GPI-linked cell wall protein	7.42419	1.45937	1.8424	5.54241	5.50135
CAGL0L06776g	2890816			Has domain(s) with predicted sequence-specific DNA binding, sequence-specific DNA binding transcription factor activity, zinc ion binding activity and role in regulation of transcription, DNA-dependent	4.91005	1.52143	1.18375	3.85699	3.40029
CAGL0I03806g	2889255		BPL1	Ortholog(s) have biotin-[acetyl-CoA-carboxylase] ligase activity, biotin-[pyruvate-carboxylase] ligase activity, role in protein biotinylation and cytoplasm, nucleus localization	2.7219	2.94501	3.2738	3.02405	3.12323
CAGL0H08844g	2888677		DDR48	Putative adhesin-like protein	3.22853	1.42918	1.20199	1.03838	1.2823
CAGL0A04081g	2886450		YLR194C	Predicted GPI-linked cell wall protein	13.5923	-1.14929	-1.21106	6.67704	10.5305
CAGL0L05434g	2890790	SUN4	NCA3	Ortholog(s) have beta-glucosidase activity, role in fungal-type cell wall biogenesis, mitochondrion organization and fungal-type cell wall localization	11.5485	1.47276	1.56413	5.67849	11.554
CAGL0B02211g	2886704	CCH1	CCH1	Putative calcium transporter; subunit of a plasma membrane gated channel involved in Ca2+ uptake; N-glycosylated integral membrane protein; required for viability upon prolonged fluconazole stress	2.12668	-1.16586	1.08381	2.45508	1.88017
CAGL0C00363g	2886951	KRE9	KRE9	Protein involved in cell wall beta-1,6-glucan synthesis	2.14573	-1.55079	1.11059	1.44419	2.26649
CAGL0H01287g	2888477		SSD1	Ortholog(s) have mRNA 5'-UTR binding, translation repressor activity, nucleic acid binding activity	2.14445	-1.1396	1.02859	1.56244	1.82426
CAGL0L06798g	2890817		MDH3	Ortholog(s) have L-malate dehydrogenase activity, mRNA binding activity and peroxisome localization	2.00671	-1.12858	1.04343	1.47419	1.77766
CAGL0J03432g	2889694		ARK1	Ortholog(s) have protein serine/threonine kinase activity, role in actin filament organization, protein phosphorylation, regulation of endocytosis and actin cortical patch, mating projection tip localization	2.21736	-1.0848	1.05883	1.20491	1.5356
CAGL0M02167g	2891766		PRM4	Has domain(s) with predicted electron carrier activity, protein disulfide oxidoreductase activity and role in cell redox homeostasis	2.22782	-1.25257	1.06807	1.26371	1.88527
CAGL0I08591g	2888926		YER158C	Ortholog of S. cerevisiae : YER158C	3.22564	-1.00585	1.01115	2.11797	2.37436
CAGL0L02827g	2890866		PTP2	Ortholog(s) have protein tyrosine phosphatase activity	3.13931	-1.23393	1.02709	1.5001	2.31983
CAGL0J03916g	2889662		HES1	Ortholog(s) have oxysterol binding, sterol transporter activity and role in endocytosis, exocytosis, maintenance of cell polarity, sterol transport	2.19636	-1.00384	1.51718	1.37093	1.69243
CAGL0L10648g	2891041		CLN1	Ortholog(s) have cytoplasm, nucleus localization	2.10596	-1.06559	1.61677	1.67484	1.71386
CAGL0I04774g	2889364		CSG2	Ortholog(s) have enzyme regulator activity, role in cellular calcium ion homeostasis and integral to endoplasmic reticulum membrane localization	2.36894	-1.00642	1.16036	2.07942	2.67921
CAGL0M01760g	2891191	CDR1	PDR5	Multidrug transporter of ATP-binding cassette (ABC) superfamily, involved in resistance to azoles; expression regulated by Pdr1p; increased abundance in azole resistant strains; expression increased by loss of the mitochondrial genome	2.02975	-1.00316	1.1575	2.00155	2.57628
CAGL0J09328g	2889927		PCL2	Ortholog(s) have cyclin-dependent protein kinase regulator activity	3.05677	-1.0282	3.09683	1.7597	3.27936
CAGL0E05170g	2887289	GRE2(A)	ARI1	Putative methylglyoxal reductase (NADPH-dependent)	2.17813	1.0691	-1.2707	1.11405	1.12902
CAGL0G05830g	2888165		CRP1	Ortholog(s) have DNA binding activity	2.10636	1.0129	-1.04811	1.01824	1.39279
CAGL0K11572g	2890522		SBA1	Ortholog(s) have chaperone binding activity, role in positive regulation of telomere maintenance via telomerase, protein folding, regulation of mitotic cell cycle, regulation of telomerase activity and cytosol, nucleus localization	2.47515	1.11433	-1.17644	1.41945	1.59625
CAGL0K04719g	2890010		YNL208W	Ortholog(s) have mitochondrion, ribosome, soluble fraction localization	2.30962	1.29959	-1.0489	1.37805	1.67035
CAGL0J04158g	2889648	RCN2	RCN2	Regulator of calcineurin; regulated by the calcineurin-Crz1p pathway; acts as a feedback regulator of calcineurin-dependent signaling	2.6896	1.02874	-1.11478	1.98353	2.45357
CAGL0M11462g	2891408		ICT1	Ortholog(s) have lysophosphatidic acid acyltransferase activity and role in phosphatidic acid biosynthetic process	2.43168	1.06845	-1.09053	2.47303	2.29347
CAGL0M07612g	2891729		FMS1	Ortholog(s) have polyamine oxidase activity, role in pantothenate biosynthetic process, polyamine catabolic process and cytoplasm localization	2.04624	1.00866	-1.24039	2.54454	1.73527
CAGL0G03245g	2888070		IML2	Ortholog(s) have mitochondrial outer membrane, nucleus localization	2.40803	-1.22044	-1.25786	1.58077	2.2154
CAGL0H05687g	2888906		SSU1	Ortholog(s) have sulfite transmembrane transporter activity	2.13808	-1.04118	-1.24809	1.28711	2.13067
CAGL0M06545g	2891680		SSH4	Ortholog(s) have role in protein targeting to vacuole involved in ubiquitin-dependent protein catabolic process via the multivesicular body sorting pathway and fungal-type vacuole localization	2.67904	-1.17999	-1.06943	1.58302	1.9591
CAGL0D05940g	2887028	ERG1	ERG1	Squalene epoxidase with a role in ergosterol synthesis; involved in growth under conditions of low oxygen tension	2.27263	-1.59309	-1.17558	1.39604	2.99701
CAGL0M04191g	2891538	YPS1	YPS1	Yapsin family aspartic protease; predicted GPI-anchor; complements cell wall defect phenotypes of S. cerevisiae yps1 mutant; regulation of pH homeostasis under acid conditions; induced by high temperature, Slt1- and Crz1p-dependent	2.11558	-1.22167	-1.32854	2.0373	2.84648
CAGL0M12320g	2891428		FLC2	Ortholog(s) have FAD transmembrane transporter activity, role in FAD transport, fungal-type cell wall biogenesis, protein folding, transmembrane transport and endoplasmic reticulum localization	2.5	-1.22347	-1.50642	1.8465	3.13023
CAGL0M13805g	2891235	MP65	SCW10	65 kDa mannoprotein	2.44801	-1.50385	-1.19317	2.70714	2.82526
CAGL0D04752g	2887110		YPR127W	Ortholog(s) have pyridoxine:NADP 4-dehydrogenase activity, role in oxidation-reduction process, pyridoxal biosynthetic process and cytosol, nucleus localization	3.51156	-1.66244	-1.35944	-1.17337	1.23091
CAGL0I07249g	2889193		BAG7	Putative GTPase-activating protein involved in cell wall and cytoskeleton homeostasis; gene is upregulated in azole-resistant strain	3.20787	-1.03698	-1.06859	-1.09387	1.81623
CAGL0L02321g	2890901		MET14	Ortholog(s) have role in methionine biosynthetic process and cytosol, nucleus localization	2.41203	-1.0263	-1.83513	-1.31914	1.3777
CAGL0A01870g	2886284		PEP1	ORF, Uncharacterized	2.64333	-1.00088	1.01267	-1.32743	1.18635
CAGL0H04851g	2888684		PPZ1	Ortholog(s) have 4-nitrophenylphosphatase activity, protein serine/threonine phosphatase activity and role in cellular protein localization, cellular sodium ion homeostasis, protein dephosphorylation	2.88253	-1.23676	1.27861	-1.0324	1.5391
CAGL0I04246g	2889075		SUT1	Putative transcription factor involved in sterol uptake; gene is upregulated in azole-resistant strain	2.36673	-1.6314	1.25397	-1.14925	1.28384
CAGL0M11902g	2891254		FUN19	Ortholog of S. cerevisiae : FUN19	3.05579	-1.1396	1.44257	-1.04141	2.32845
CAGL0M09020g	2891299		SFC1	Ortholog(s) have succinate:fumarate antiporter activity, role in fumarate transport, succinate transport and mitochondrion, plasma membrane localization	2.33584	1.16798	1.15813	-1.07247	1.42984
Yellow-colored columns show the genes up-regulated by TM exposure
Blue-colored columns show the putative Slt2-regulted genes
