# Supplementary material for: Dissection of Ire1 Functions Reveals Stress Response Mechanisms Uniquely Evolved in Candida glabrata
Source: PLoS Pathog. 2013 Jan 31;9(1):e1003160. doi: 10.1371/journal.ppat.1003160 (PMC3561209; doi:10.1371/journal.ppat.1003160)
Supplement: Table S3 — Classification of the putative Slt2-repressed genes. (XLSX) [file ppat.1003160.s009.xlsx]

## Sheet: Sheet1
Table S3. Classification of the putative Slt2-repressed genes
Process
GOID	GO_term	Cluster frequency	Background frequency	Corrected P-value	Gene(s) annotated to the term	Directly Annotated GOID List
6412	translation	28 out of 42 genes, 66.7%	563 out of 5481 background genes, 10.3%	2.16e-16	CAGL0D00616g:CAGL0E01991g:CAGL0E04994g:FRS1:CAGL0F07073g:CAGL0G01078g:CAGL0G02079g:CAGL0G02475g:CAGL0G05940g:CAGL0G07227g:CAGL0H04521g:CAGL0J02816g:CAGL0J03234g:RPS12:CAGL0J11220g:CAGL0K03135g:CAGL0K06149g:CAGL0K06567g:CAGL0K08382g:PRT1:RPS11B:CAGL0L04510g:CAGL0L04532g:PDR13:CAGL0M06523g:CAGL0M07722g:CAGL0M08118g:CAGL0M10241g	42254:55114:6364:288:2181:469:6412:6413:6425:45903:461:16567:7005:32436:2000208:27:6415:28:42274:10620:30490:6407:6450:6432:447:35690:462
10467	gene expression	36 out of 42 genes, 85.7%	1211 out of 5481 background genes, 22.1%	3.02e-16	CAGL0D00616g:CAGL0E01991g:CAGL0E04994g:CAGL0E05500g:FRS1:CAGL0F07073g:CAGL0G01078g:CAGL0G02079g:CAGL0G02475g:CAGL0G05940g:CAGL0G07227g:CAGL0H03685g:CAGL0H04521g:CAGL0I03234g:CAGL0I09790g:CAGL0J01848g:CAGL0J02816g:CAGL0J03234g:RPS12:CAGL0J11220g:CAGL0K01991g:CAGL0K03135g:CAGL0K06149g:CAGL0K06567g:CAGL0K08382g:PRT1:RPS11B:CAGL0L04510g:CAGL0L04532g:PDR13:CAGL0M04829g:CAGL0M06523g:CAGL0M07722g:CAGL0M…	398:34503:288:469:6413:495:16567:6406:7005:32436:30447:27:28:42274:30490:6432:447:462:42254:55114:6364:7000:30488:2181:480:6412:464:31120:6425:45903:461:2000208:6415:10620:6407:6450:42790:472:35690:31118
34645	cellular macromolecule biosynthetic process	30 out of 42 genes, 71.4%	976 out of 5481 background genes, 17.8%	3.98e-12	CAGL0D00616g:CAGL0E01991g:CAGL0E04994g:CAGL0E05500g:FRS1:CAGL0F07073g:CAGL0G01078g:CAGL0G02079g:CAGL0G02475g:CAGL0G05940g:CAGL0G07227g:CAGL0H04521g:CAGL0J01848g:CAGL0J02816g:CAGL0J03234g:RPS12:CAGL0J11220g:CAGL0K03135g:CAGL0K06149g:CAGL0K06567g:CAGL0K08382g:PRT1:RPS11B:CAGL0L04510g:CAGL0L04532g:PDR13:CAGL0M06523g:CAGL0M07722g:CAGL0M08118g:CAGL0M10241g	34503:288:469:6413:16567:6406:7005:32436:27:28:42274:30490:6432:447:462:42254:55114:6364:7000:2181:6412:6425:45903:461:2000208:6415:10620:6407:6450:42790:35690
9059	macromolecule biosynthetic process	30 out of 42 genes, 71.4%	980 out of 5481 background genes, 17.9%	4.47e-12	CAGL0D00616g:CAGL0E01991g:CAGL0E04994g:CAGL0E05500g:FRS1:CAGL0F07073g:CAGL0G01078g:CAGL0G02079g:CAGL0G02475g:CAGL0G05940g:CAGL0G07227g:CAGL0H04521g:CAGL0J01848g:CAGL0J02816g:CAGL0J03234g:RPS12:CAGL0J11220g:CAGL0K03135g:CAGL0K06149g:CAGL0K06567g:CAGL0K08382g:PRT1:RPS11B:CAGL0L04510g:CAGL0L04532g:PDR13:CAGL0M06523g:CAGL0M07722g:CAGL0M08118g:CAGL0M10241g	34503:288:469:6413:16567:6406:7005:32436:27:28:42274:30490:6432:447:462:42254:55114:6364:7000:2181:6412:6425:45903:461:2000208:6415:10620:6407:6450:42790:35690
42254	ribosome biogenesis	19 out of 42 genes, 45.2%	288 out of 5481 background genes, 5.3%	5.88e-12	CAGL0C02343g:CAGL0E01991g:CAGL0F07073g:CAGL0G02079g:CAGL0G02475g:CAGL0G07227g:CAGL0H03685g:CAGL0I03234g:CAGL0I09790g:CAGL0J03234g:CAGL0J11220g:CAGL0K03135g:CAGL0K06149g:CAGL0K08382g:RPS11B:CAGL0L04510g:PDR13:CAGL0M04829g:CAGL0M13519g	398:469:495:7059:16567:30447:27:28:42274:30490:447:462:42254:6364:2181:480:6412:464:31120:45903:461:2000208:6407:30261:6450:472:35690:56:31118
44249	cellular biosynthetic process	33 out of 42 genes, 78.6%	1367 out of 5481 background genes, 24.9%	5.22e-11	CAGL0D00616g:CAGL0E01991g:CAGL0E04994g:CAGL0E05500g:FRS1:CAGL0F03927g:CAGL0F07073g:CAGL0G01078g:CAGL0G02079g:CAGL0G02475g:CAGL0G05940g:APT1:CAGL0G07227g:CAGL0H04521g:DYS1:CAGL0J01848g:CAGL0J02816g:CAGL0J03234g:RPS12:CAGL0J11220g:CAGL0K03135g:CAGL0K06149g:CAGL0K06567g:CAGL0K08382g:PRT1:RPS11B:CAGL0L04510g:CAGL0L04532g:PDR13:CAGL0M06523g:CAGL0M07722g:CAGL0M08118g:CAGL0M10241g	9116:34503:288:469:6413:6177:16567:6406:7005:32436:27:28:42274:30490:6432:447:6168:462:42254:55114:6364:7000:2181:8612:6412:6425:45903:461:2000208:6415:6541:10620:6407:6450:42790:35690
9058	biosynthetic process	33 out of 42 genes, 78.6%	1419 out of 5481 background genes, 25.9%	1.62e-10	CAGL0D00616g:CAGL0E01991g:CAGL0E04994g:CAGL0E05500g:FRS1:CAGL0F03927g:CAGL0F07073g:CAGL0G01078g:CAGL0G02079g:CAGL0G02475g:CAGL0G05940g:APT1:CAGL0G07227g:CAGL0H04521g:DYS1:CAGL0J01848g:CAGL0J02816g:CAGL0J03234g:RPS12:CAGL0J11220g:CAGL0K03135g:CAGL0K06149g:CAGL0K06567g:CAGL0K08382g:PRT1:RPS11B:CAGL0L04510g:CAGL0L04532g:PDR13:CAGL0M06523g:CAGL0M07722g:CAGL0M08118g:CAGL0M10241g	9116:34503:288:469:6413:6177:16567:6406:7005:32436:27:28:42274:30490:6432:447:6168:462:42254:55114:6364:7000:2181:8612:6412:6425:45903:461:2000208:6415:6541:10620:6407:6450:42790:35690
22613	ribonucleoprotein complex biogenesis	19 out of 42 genes, 45.2%	347 out of 5481 background genes, 6.3%	1.75e-10	CAGL0C02343g:CAGL0E01991g:CAGL0F07073g:CAGL0G02079g:CAGL0G02475g:CAGL0G07227g:CAGL0H03685g:CAGL0I03234g:CAGL0I09790g:CAGL0J03234g:CAGL0J11220g:CAGL0K03135g:CAGL0K06149g:CAGL0K08382g:RPS11B:CAGL0L04510g:PDR13:CAGL0M04829g:CAGL0M13519g	398:469:495:7059:16567:30447:27:28:42274:30490:447:462:42254:6364:2181:480:6412:464:31120:45903:461:2000208:6407:30261:6450:472:35690:56:31118
42274	ribosomal small subunit biogenesis	12 out of 42 genes, 28.6%	107 out of 5481 background genes, 2.0%	1.6e-09	CAGL0E01991g:CAGL0G07227g:CAGL0I03234g:CAGL0I09790g:CAGL0J03234g:CAGL0K03135g:CAGL0K06149g:CAGL0K08382g:RPS11B:CAGL0L04510g:CAGL0M04829g:CAGL0M13519g	398:469:30447:28:42274:30490:447:462:6364:480:6412:464:461:2000208:6407:472
44260	cellular macromolecule metabolic process	38 out of 42 genes, 90.5%	2204 out of 5481 background genes, 40.2%	1.72e-09	CAGL0C02343g:CAGL0D00616g:CAGL0E01991g:CAGL0E04994g:CAGL0E05500g:FRS1:CAGL0F07073g:CAGL0G01078g:CAGL0G02079g:CAGL0G02475g:CAGL0G05940g:CAGL0G07227g:CAGL0H03685g:CAGL0H04521g:DYS1:CAGL0I03234g:CAGL0I09790g:CAGL0J01848g:CAGL0J02816g:CAGL0J03234g:RPS12:CAGL0J11220g:CAGL0K01991g:CAGL0K03135g:CAGL0K06149g:CAGL0K06567g:CAGL0K08382g:PRT1:RPS11B:CAGL0L04510g:CAGL0L04532g:PDR13:CAGL0M04829g:CAGL0M06523g:C…	398:34503:288:469:6413:495:7059:16567:6406:7005:32436:30447:27:28:42274:30490:6432:447:462:42254:55114:6364:30488:7000:480:2181:8612:6412:464:31120:6425:45903:461:2000208:6415:10620:6407:30261:6450:472:42790:35690:56:31118
43170	macromolecule metabolic process	38 out of 42 genes, 90.5%	2265 out of 5481 background genes, 41.3%	4.57e-09	CAGL0C02343g:CAGL0D00616g:CAGL0E01991g:CAGL0E04994g:CAGL0E05500g:FRS1:CAGL0F07073g:CAGL0G01078g:CAGL0G02079g:CAGL0G02475g:CAGL0G05940g:CAGL0G07227g:CAGL0H03685g:CAGL0H04521g:DYS1:CAGL0I03234g:CAGL0I09790g:CAGL0J01848g:CAGL0J02816g:CAGL0J03234g:RPS12:CAGL0J11220g:CAGL0K01991g:CAGL0K03135g:CAGL0K06149g:CAGL0K06567g:CAGL0K08382g:PRT1:RPS11B:CAGL0L04510g:CAGL0L04532g:PDR13:CAGL0M04829g:CAGL0M06523g:C…	398:34503:288:469:6413:495:7059:16567:6406:7005:32436:30447:27:28:42274:30490:6432:447:462:42254:55114:6364:30488:7000:480:2181:8612:6412:464:31120:6425:45903:461:2000208:6415:10620:6407:30261:6450:472:42790:35690:56:31118
71843	cellular component biogenesis at cellular level	19 out of 42 genes, 45.2%	465 out of 5481 background genes, 8.5%	3.14e-08	CAGL0C02343g:CAGL0E01991g:CAGL0F07073g:CAGL0G02079g:CAGL0G02475g:CAGL0G07227g:CAGL0H03685g:CAGL0I03234g:CAGL0I09790g:CAGL0J03234g:CAGL0J11220g:CAGL0K03135g:CAGL0K06149g:CAGL0K08382g:RPS11B:CAGL0L04510g:PDR13:CAGL0M04829g:CAGL0M13519g	398:469:495:7059:16567:30447:27:28:42274:30490:447:462:42254:6364:2181:480:6412:464:31120:45903:461:2000208:6407:30261:6450:472:35690:56:31118
44267	cellular protein metabolic process	29 out of 42 genes, 69.0%	1298 out of 5481 background genes, 23.7%	7.6e-08	CAGL0D00616g:CAGL0E01991g:CAGL0E04994g:FRS1:CAGL0F07073g:CAGL0G01078g:CAGL0G02079g:CAGL0G02475g:CAGL0G05940g:CAGL0G07227g:CAGL0H04521g:DYS1:CAGL0J02816g:CAGL0J03234g:RPS12:CAGL0J11220g:CAGL0K03135g:CAGL0K06149g:CAGL0K06567g:CAGL0K08382g:PRT1:RPS11B:CAGL0L04510g:CAGL0L04532g:PDR13:CAGL0M06523g:CAGL0M07722g:CAGL0M08118g:CAGL0M10241g	288:469:6413:16567:7005:32436:27:28:42274:30490:6432:447:462:42254:55114:6364:2181:8612:6412:6425:45903:461:2000208:6415:10620:6407:6450:35690
44238	primary metabolic process	40 out of 42 genes, 95.2%	2855 out of 5481 background genes, 52.1%	1.24e-07	CAGL0C02343g:CAGL0D00616g:CAGL0E01991g:CAGL0E04994g:CAGL0E05500g:FRS1:CAGL0F03927g:CAGL0F07073g:CAGL0G01078g:CAGL0G02079g:CAGL0G02475g:CAGL0G05940g:APT1:CAGL0G07227g:CAGL0H03685g:CAGL0H04521g:DYS1:CAGL0I03234g:CAGL0I09790g:CAGL0J01848g:CAGL0J02816g:CAGL0J03234g:RPS12:CAGL0J11220g:CAGL0K01991g:CAGL0K03135g:CAGL0K06149g:CAGL0K06567g:CAGL0K08382g:PRT1:RPS11B:CAGL0L04510g:CAGL0L04532g:PDR13:CAGL0M048…	398:9116:34503:288:469:6413:495:6177:7059:16567:6406:7005:32436:30447:27:28:42274:30490:6432:447:6168:462:42254:55114:6364:30488:7000:480:2181:8612:6412:464:31120:6425:45903:461:2000208:6415:6541:10620:6407:30261:6450:472:42790:35690:56:31118
19538	protein metabolic process	29 out of 42 genes, 69.0%	1355 out of 5481 background genes, 24.7%	2.26e-07	CAGL0D00616g:CAGL0E01991g:CAGL0E04994g:FRS1:CAGL0F07073g:CAGL0G01078g:CAGL0G02079g:CAGL0G02475g:CAGL0G05940g:CAGL0G07227g:CAGL0H04521g:DYS1:CAGL0J02816g:CAGL0J03234g:RPS12:CAGL0J11220g:CAGL0K03135g:CAGL0K06149g:CAGL0K06567g:CAGL0K08382g:PRT1:RPS11B:CAGL0L04510g:CAGL0L04532g:PDR13:CAGL0M06523g:CAGL0M07722g:CAGL0M08118g:CAGL0M10241g	288:469:6413:16567:7005:32436:27:28:42274:30490:6432:447:462:42254:55114:6364:2181:8612:6412:6425:45903:461:2000208:6415:10620:6407:6450:35690
44237	cellular metabolic process	40 out of 42 genes, 95.2%	2947 out of 5481 background genes, 53.8%	4.17e-07	CAGL0C02343g:CAGL0D00616g:CAGL0E01991g:CAGL0E04994g:CAGL0E05500g:FRS1:CAGL0F03927g:CAGL0F07073g:CAGL0G01078g:CAGL0G02079g:CAGL0G02475g:CAGL0G05940g:APT1:CAGL0G07227g:CAGL0H03685g:CAGL0H04521g:DYS1:CAGL0I03234g:CAGL0I09790g:CAGL0J01848g:CAGL0J02816g:CAGL0J03234g:RPS12:CAGL0J11220g:CAGL0K01991g:CAGL0K03135g:CAGL0K06149g:CAGL0K06567g:CAGL0K08382g:PRT1:RPS11B:CAGL0L04510g:CAGL0L04532g:PDR13:CAGL0M048…	398:9116:34503:288:469:6413:495:6177:7059:16567:6406:7005:32436:30447:27:28:42274:30490:6432:447:6168:462:42254:55114:6364:30488:7000:480:2181:8612:6412:464:31120:6425:45903:461:2000208:6415:6541:10620:6407:30261:6450:472:42790:35690:56:31118
6364	rRNA processing	12 out of 42 genes, 28.6%	191 out of 5481 background genes, 3.5%	1.44e-06	CAGL0G07227g:CAGL0H03685g:CAGL0I03234g:CAGL0I09790g:CAGL0J03234g:CAGL0K03135g:CAGL0K08382g:RPS11B:CAGL0L04510g:PDR13:CAGL0M04829g:CAGL0M13519g	398:469:495:30447:28:42274:30490:447:462:6364:2181:480:6412:464:31120:461:2000208:6407:6450:472:31118
30490	maturation of SSU-rRNA	9 out of 42 genes, 21.4%	89 out of 5481 background genes, 1.6%	2.15e-06	CAGL0G07227g:CAGL0I03234g:CAGL0I09790g:CAGL0J03234g:CAGL0K03135g:CAGL0K08382g:RPS11B:CAGL0L04510g:CAGL0M04829g	398:469:30447:28:30490:447:462:480:6412:464:461:2000208:6407:472
34660	ncRNA metabolic process	15 out of 42 genes, 35.7%	347 out of 5481 background genes, 6.3%	2.3e-06	FRS1:CAGL0G07227g:CAGL0H03685g:CAGL0I03234g:CAGL0I09790g:CAGL0J03234g:CAGL0K01991g:CAGL0K03135g:CAGL0K08382g:RPS11B:CAGL0L04510g:CAGL0L04532g:PDR13:CAGL0M04829g:CAGL0M13519g	398:469:495:30447:28:42274:30490:6432:447:462:6364:30488:2181:480:6412:464:31120:6425:461:2000208:6407:6450:472:35690:31118
16072	rRNA metabolic process	12 out of 42 genes, 28.6%	204 out of 5481 background genes, 3.7%	3.05e-06	CAGL0G07227g:CAGL0H03685g:CAGL0I03234g:CAGL0I09790g:CAGL0J03234g:CAGL0K03135g:CAGL0K08382g:RPS11B:CAGL0L04510g:PDR13:CAGL0M04829g:CAGL0M13519g	398:469:495:30447:28:42274:30490:447:462:6364:2181:480:6412:464:31120:461:2000208:6407:6450:472:31118
51029	rRNA transport	5 out of 42 genes, 11.9%	13 out of 5481 background genes, 0.2%	3.66e-06	CAGL0E01991g:CAGL0F07073g:CAGL0G07227g:CAGL0J11220g:CAGL0L04510g	469:28:42274:30490:447:6412:45903:2000208:6407
6407	rRNA export from nucleus	5 out of 42 genes, 11.9%	13 out of 5481 background genes, 0.2%	3.66e-06	CAGL0E01991g:CAGL0F07073g:CAGL0G07227g:CAGL0J11220g:CAGL0L04510g	469:28:42274:30490:447:6412:45903:2000208:6407
8152	metabolic process	40 out of 42 genes, 95.2%	3143 out of 5481 background genes, 57.3%	4.79e-06	CAGL0C02343g:CAGL0D00616g:CAGL0E01991g:CAGL0E04994g:CAGL0E05500g:FRS1:CAGL0F03927g:CAGL0F07073g:CAGL0G01078g:CAGL0G02079g:CAGL0G02475g:CAGL0G05940g:APT1:CAGL0G07227g:CAGL0H03685g:CAGL0H04521g:DYS1:CAGL0I03234g:CAGL0I09790g:CAGL0J01848g:CAGL0J02816g:CAGL0J03234g:RPS12:CAGL0J11220g:CAGL0K01991g:CAGL0K03135g:CAGL0K06149g:CAGL0K06567g:CAGL0K08382g:PRT1:RPS11B:CAGL0L04510g:CAGL0L04532g:PDR13:CAGL0M048…	398:9116:34503:288:469:6413:495:6177:7059:16567:6406:7005:32436:30447:27:28:42274:30490:6432:447:6168:462:42254:55114:6364:30488:7000:480:2181:8612:6412:464:31120:6425:45903:461:2000208:6415:6541:10620:6407:30261:6450:472:42790:35690:56:31118
462	maturation of SSU-rRNA from tricistronic rRNA transcript (SSU-rRNA, 5.8S rRNA, LSU-rRNA)	8 out of 42 genes, 19.0%	79 out of 5481 background genes, 1.4%	1.48e-05	CAGL0G07227g:CAGL0I03234g:CAGL0I09790g:CAGL0J03234g:CAGL0K03135g:CAGL0K08382g:RPS11B:CAGL0M04829g	398:30447:28:447:462:480:6412:464:461:6407:472
34470	ncRNA processing	13 out of 42 genes, 31.0%	293 out of 5481 background genes, 5.3%	2.02e-05	CAGL0G07227g:CAGL0H03685g:CAGL0I03234g:CAGL0I09790g:CAGL0J03234g:CAGL0K01991g:CAGL0K03135g:CAGL0K08382g:RPS11B:CAGL0L04510g:PDR13:CAGL0M04829g:CAGL0M13519g	398:469:495:30447:28:42274:30490:447:462:6364:30488:2181:480:6412:464:31120:461:2000208:6407:6450:472:31118
16070	RNA metabolic process	18 out of 42 genes, 42.9%	756 out of 5481 background genes, 13.8%	0.00052	CAGL0E05500g:FRS1:CAGL0G07227g:CAGL0H03685g:CAGL0I03234g:CAGL0I09790g:CAGL0J01848g:CAGL0J02816g:CAGL0J03234g:CAGL0K01991g:CAGL0K03135g:CAGL0K08382g:RPS11B:CAGL0L04510g:CAGL0L04532g:PDR13:CAGL0M04829g:CAGL0M13519g	398:34503:288:469:495:6406:32436:30447:28:42274:30490:6432:447:462:55114:6364:30488:7000:2181:480:6412:464:31120:6425:461:2000208:6415:10620:6407:6450:472:42790:35690:31118
44085	cellular component biogenesis	19 out of 42 genes, 45.2%	848 out of 5481 background genes, 15.5%	0.0006	CAGL0C02343g:CAGL0E01991g:CAGL0F07073g:CAGL0G02079g:CAGL0G02475g:CAGL0G07227g:CAGL0H03685g:CAGL0I03234g:CAGL0I09790g:CAGL0J03234g:CAGL0J11220g:CAGL0K03135g:CAGL0K06149g:CAGL0K08382g:RPS11B:CAGL0L04510g:PDR13:CAGL0M04829g:CAGL0M13519g	398:469:495:7059:16567:30447:27:28:42274:30490:447:462:42254:6364:2181:480:6412:464:31120:45903:461:2000208:6407:30261:6450:472:35690:56:31118
6396	RNA processing	13 out of 42 genes, 31.0%	452 out of 5481 background genes, 8.2%	0.00272	CAGL0G07227g:CAGL0H03685g:CAGL0I03234g:CAGL0I09790g:CAGL0J03234g:CAGL0K01991g:CAGL0K03135g:CAGL0K08382g:RPS11B:CAGL0L04510g:PDR13:CAGL0M04829g:CAGL0M13519g	398:469:495:30447:28:42274:30490:447:462:6364:30488:2181:480:6412:464:31120:461:2000208:6407:6450:472:31118
51168	nuclear export	7 out of 42 genes, 16.7%	116 out of 5481 background genes, 2.1%	0.00333	CAGL0C02343g:CAGL0E01991g:CAGL0E05500g:CAGL0F07073g:CAGL0G07227g:CAGL0J11220g:CAGL0L04510g	34503:469:7059:6406:28:42274:30490:447:7000:6412:45903:2000208:6407:30261:42790:35690:56
6405	RNA export from nucleus	6 out of 42 genes, 14.3%	88 out of 5481 background genes, 1.6%	0.00685	CAGL0E01991g:CAGL0E05500g:CAGL0F07073g:CAGL0G07227g:CAGL0J11220g:CAGL0L04510g	34503:469:6406:28:42274:30490:447:7000:6412:45903:2000208:6407:42790
Function
GOID	GO_term	Cluster frequency	Background frequency	Corrected P-value	Gene(s) annotated to the term	Directly Annotated GOID List
3735	structural constituent of ribosome	23 out of 42 genes, 54.8%	167 out of 5481 background genes, 3.0%	3e-23	CAGL0D00616g:CAGL0E01991g:CAGL0E04994g:CAGL0F07073g:CAGL0G01078g:CAGL0G02079g:CAGL0G02475g:CAGL0G05940g:CAGL0G07227g:CAGL0H04521g:CAGL0J00165g:CAGL0J03234g:RPS12:CAGL0J11220g:CAGL0K03135g:CAGL0K06149g:CAGL0K06567g:CAGL0K08382g:RPS11B:CAGL0L04510g:CAGL0M06523g:CAGL0M08118g:CAGL0M10241g	3906:166:3735:70181:19843:3723
5198	structural molecule activity	23 out of 42 genes, 54.8%	293 out of 5481 background genes, 5.3%	1.61e-17	CAGL0D00616g:CAGL0E01991g:CAGL0E04994g:CAGL0F07073g:CAGL0G01078g:CAGL0G02079g:CAGL0G02475g:CAGL0G05940g:CAGL0G07227g:CAGL0H04521g:CAGL0J00165g:CAGL0J03234g:RPS12:CAGL0J11220g:CAGL0K03135g:CAGL0K06149g:CAGL0K06567g:CAGL0K08382g:RPS11B:CAGL0L04510g:CAGL0M06523g:CAGL0M08118g:CAGL0M10241g	3906:166:3735:70181:19843:3723
3723	RNA binding	15 out of 42 genes, 35.7%	547 out of 5481 background genes, 10.0%	0.00023	CAGL0E04994g:FRS1:CAGL0F07073g:CAGL0G01078g:CAGL0G07227g:CAGL0H03685g:CAGL0I03234g:CAGL0J02816g:CAGL0J11220g:CAGL0K01991g:CAGL0K03135g:PRT1:CAGL0M04829g:CAGL0M10241g:CAGL0M13519g	8266:3906:8143:3735:4004:19843:9982:31418:287:4826:5506:5524:16706:166:70181:3743:3723:16428
Component
GOID	GO_term	Cluster frequency	Background frequency	Corrected P-value	Gene(s) annotated to the term	Directly Annotated GOID List
30529	ribonucleoprotein complex	31 out of 42 genes, 73.8%	562 out of 5481 background genes, 10.3%	6.73e-21	CAGL0C02343g:CAGL0D00616g:CAGL0E01991g:CAGL0E04994g:CAGL0F07073g:CAGL0G01078g:CAGL0G02079g:CAGL0G02475g:CAGL0G05940g:CAGL0G07227g:CAGL0H03685g:CAGL0H04521g:CAGL0I03234g:CAGL0I09790g:CAGL0J00165g:CAGL0J03234g:RPS12:CAGL0J11220g:CAGL0K03135g:CAGL0K06149g:CAGL0K06567g:CAGL0K08382g:PRT1:RPS11B:CAGL0L04510g:PDR13:CAGL0M04829g:CAGL0M06523g:CAGL0M08118g:CAGL0M10241g:CAGL0M13519g	9295:9986:5829:32040:5840:5739:71541:43614:5635:30687:71540:5844:31429:9277:30688:16282:31428:5730:5634:22625:46540:30686:22627:10494
5840	ribosome	24 out of 42 genes, 57.1%	274 out of 5481 background genes, 5.0%	1.6e-19	CAGL0C02343g:CAGL0D00616g:CAGL0E01991g:CAGL0E04994g:CAGL0F07073g:CAGL0G01078g:CAGL0G02079g:CAGL0G02475g:CAGL0G05940g:CAGL0G07227g:CAGL0H04521g:CAGL0J00165g:CAGL0J03234g:RPS12:CAGL0J11220g:CAGL0K03135g:CAGL0K06149g:CAGL0K06567g:CAGL0K08382g:RPS11B:CAGL0L04510g:CAGL0M06523g:CAGL0M08118g:CAGL0M10241g	9295:9986:5829:32040:5840:5739:30688:5730:22625:5634:30686:22627
22626	cytosolic ribosome	14 out of 42 genes, 33.3%	66 out of 5481 background genes, 1.2%	5.88e-16	CAGL0D00616g:CAGL0E01991g:CAGL0E04994g:CAGL0F07073g:CAGL0G01078g:CAGL0H04521g:CAGL0J00165g:RPS12:CAGL0J11220g:CAGL0K03135g:CAGL0K08382g:RPS11B:CAGL0L04510g:CAGL0M08118g	32040:30688:5730:5634:22625:30686:22627
43228	non-membrane-bounded organelle	33 out of 42 genes, 78.6%	1088 out of 5481 background genes, 19.9%	1.42e-14	CAGL0C02343g:CAGL0D00616g:CAGL0E01991g:CAGL0E04994g:CAGL0E05500g:CAGL0F07073g:CAGL0G01078g:CAGL0G02079g:CAGL0G02409g:CAGL0G02475g:CAGL0G05940g:CAGL0G07227g:CAGL0H03685g:CAGL0H04521g:CAGL0I03234g:CAGL0I09790g:CAGL0J00165g:CAGL0J01848g:CAGL0J03234g:RPS12:CAGL0J11220g:CAGL0K03135g:CAGL0K06149g:CAGL0K06567g:CAGL0K08382g:PRT1:RPS11B:CAGL0L04510g:CAGL0M04829g:CAGL0M06523g:CAGL0M08118g:CAGL0M10241g:CAGL…	9295:9986:5829:32040:5840:5739:5736:71541:43614:5635:30687:71540:31429:9277:30688:16282:31428:5730:22625:5634:46540:30686:22627:10494
43232	intracellular non-membrane-bounded organelle	33 out of 42 genes, 78.6%	1088 out of 5481 background genes, 19.9%	1.42e-14	CAGL0C02343g:CAGL0D00616g:CAGL0E01991g:CAGL0E04994g:CAGL0E05500g:CAGL0F07073g:CAGL0G01078g:CAGL0G02079g:CAGL0G02409g:CAGL0G02475g:CAGL0G05940g:CAGL0G07227g:CAGL0H03685g:CAGL0H04521g:CAGL0I03234g:CAGL0I09790g:CAGL0J00165g:CAGL0J01848g:CAGL0J03234g:RPS12:CAGL0J11220g:CAGL0K03135g:CAGL0K06149g:CAGL0K06567g:CAGL0K08382g:PRT1:RPS11B:CAGL0L04510g:CAGL0M04829g:CAGL0M06523g:CAGL0M08118g:CAGL0M10241g:CAGL…	9295:9986:5829:32040:5840:5739:5736:71541:43614:5635:30687:71540:31429:9277:30688:16282:31428:5730:22625:5634:46540:30686:22627:10494
5829	cytosol	34 out of 42 genes, 81.0%	1251 out of 5481 background genes, 22.8%	8.28e-14	CAGL0C02343g:CAGL0D00616g:CAGL0E01991g:CAGL0E04994g:CAGL0E05500g:FRS1:CAGL0F03927g:CAGL0F07073g:CAGL0G01078g:CAGL0G02079g:CAGL0G02475g:CAGL0G05940g:APT1:CAGL0G07227g:CAGL0H03685g:CAGL0H04521g:DYS1:CAGL0J00165g:CAGL0J02816g:CAGL0J03234g:RPS12:CAGL0J11220g:CAGL0K03135g:CAGL0K06149g:CAGL0K06567g:CAGL0K08382g:PRT1:RPS11B:CAGL0L04510g:CAGL0L04532g:PDR13:CAGL0M06523g:CAGL0M08118g:CAGL0M10241g	9295:9986:5829:32040:9328:5840:5739:5736:71541:43614:71540:5844:31429:9277:30688:16282:5730:22625:5634:30686:22627:10494
44445	cytosolic part	14 out of 42 genes, 33.3%	124 out of 5481 background genes, 2.3%	6.24e-12	CAGL0D00616g:CAGL0E01991g:CAGL0E04994g:CAGL0F07073g:CAGL0G01078g:CAGL0H04521g:CAGL0J00165g:RPS12:CAGL0J11220g:CAGL0K03135g:CAGL0K08382g:RPS11B:CAGL0L04510g:CAGL0M08118g	32040:30688:5730:5634:22625:30686:22627
44391	ribosomal subunit	14 out of 42 genes, 33.3%	131 out of 5481 background genes, 2.4%	1.35e-11	CAGL0D00616g:CAGL0E01991g:CAGL0E04994g:CAGL0F07073g:CAGL0G01078g:CAGL0H04521g:CAGL0J00165g:RPS12:CAGL0J11220g:CAGL0K03135g:CAGL0K08382g:RPS11B:CAGL0L04510g:CAGL0M08118g	32040:30688:5730:5634:22625:30686:22627
22627	cytosolic small ribosomal subunit	9 out of 42 genes, 21.4%	31 out of 5481 background genes, 0.6%	3e-11	CAGL0E01991g:CAGL0F07073g:CAGL0J00165g:RPS12:CAGL0J11220g:CAGL0K03135g:CAGL0K08382g:RPS11B:CAGL0L04510g	32040:30688:5730:5634:30686:22627
32991	macromolecular complex	35 out of 42 genes, 83.3%	1841 out of 5481 background genes, 33.6%	1.71e-09	CAGL0C02343g:CAGL0D00616g:CAGL0E01991g:CAGL0E04994g:CAGL0E05500g:FRS1:CAGL0F07073g:CAGL0G01078g:CAGL0G02079g:CAGL0G02475g:CAGL0G05940g:CAGL0G07227g:CAGL0H03685g:CAGL0H04521g:CAGL0I03234g:CAGL0I09790g:CAGL0J00165g:CAGL0J01848g:CAGL0J03234g:RPS12:CAGL0J11220g:CAGL0K03135g:CAGL0K06149g:CAGL0K06567g:CAGL0K08382g:PRT1:RPS11B:CAGL0L04510g:PDR13:CAGL0M04829g:CAGL0M06523g:CAGL0M07722g:CAGL0M08118g:CAGL0M…	9295:9986:5829:32040:9328:5840:5739:5736:71541:43614:5635:30687:71540:5852:5844:31429:9277:30688:16282:31428:5730:22625:5634:46540:30686:22627:10494
15935	small ribosomal subunit	9 out of 42 genes, 21.4%	65 out of 5481 background genes, 1.2%	3.95e-08	CAGL0E01991g:CAGL0F07073g:CAGL0J00165g:RPS12:CAGL0J11220g:CAGL0K03135g:CAGL0K08382g:RPS11B:CAGL0L04510g	32040:30688:5730:5634:30686:22627
5730	nucleolus	13 out of 42 genes, 31.0%	285 out of 5481 background genes, 5.2%	4.65e-06	CAGL0E05500g:CAGL0G01078g:CAGL0G02409g:CAGL0G02475g:CAGL0G07227g:CAGL0H03685g:CAGL0I03234g:CAGL0I09790g:CAGL0J01848g:CAGL0J03234g:CAGL0L04510g:CAGL0M04829g:CAGL0M13519g	5829:32040:5840:5739:5736:5635:30687:31429:31428:5730:22625:46540:30686:22627
22625	cytosolic large ribosomal subunit	5 out of 42 genes, 11.9%	19 out of 5481 background genes, 0.3%	1.02e-05	CAGL0D00616g:CAGL0E04994g:CAGL0G01078g:CAGL0H04521g:CAGL0M08118g	5730:5634:22625
30684	preribosome	9 out of 42 genes, 21.4%	139 out of 5481 background genes, 2.5%	3.37e-05	CAGL0F07073g:CAGL0G02079g:CAGL0H03685g:CAGL0I03234g:CAGL0I09790g:CAGL0J11220g:RPS11B:CAGL0M04829g:CAGL0M13519g	5829:9986:5840:32040:5635:30687:31429:30688:31428:5730:5634:46540:30686:22627
32040	small-subunit processome	5 out of 42 genes, 11.9%	47 out of 5481 background genes, 0.9%	0.00115	CAGL0F07073g:CAGL0G02079g:CAGL0I03234g:CAGL0I09790g:CAGL0M04829g	5829:9986:5840:32040:31428:5730:46540:30686:22627
30686	90S preribosome	6 out of 42 genes, 14.3%	81 out of 5481 background genes, 1.5%	0.00136	CAGL0H03685g:CAGL0I09790g:CAGL0J11220g:RPS11B:CAGL0M04829g:CAGL0M13519g	5829:32040:5635:30687:31429:30688:31428:5730:5634:30686:22627
