# Supplementary material for: Dissection of Ire1 Functions Reveals Stress Response Mechanisms Uniquely Evolved in Candida glabrata
Source: PLoS Pathog. 2013 Jan 31;9(1):e1003160. doi: 10.1371/journal.ppat.1003160 (PMC3561209; doi:10.1371/journal.ppat.1003160)
Supplement: Table S4 — List of genes whose expression levels were altered by tunicamycin treatment for 0.5 h. (XLSX) [file ppat.1003160.s010.xlsx]

## Sheet: Sheet1
Table S4. List of genes whose expressions were altered by TM treatment (0.5h)
Gene ID	Entrez Gene ID	Gene name	S. cereviisae orthologue	Description	Fold Change
					wild type	Dcnb1	Dcrz1	Dslt2	Dire1
CAGL0E03201g	2887302		CHO2	Ortholog(s) have phosphatidylethanolamine N-methyltransferase activity, role in phosphatidylcholine biosynthetic process and endoplasmic reticulum membrane, microsome localization	-1.60655	-1.98751	-1.97837	-2.57729	-2.12995
CAGL0L03740g	2890542		RKI1	Ortholog(s) have ribose-5-phosphate isomerase activity, role in pentose-phosphate shunt, pyridoxine biosynthetic process and cytoplasm, nucleus localization	-1.64233	-1.25137	-1.55538	-2.17087	-2.22352
CAGL0A02090g	2886340		YHR020W	Ortholog(s) have role in chromosome organization and cytosol, ribosome, soluble fraction localization	-1.57872	-1.04473	-1.24878	-1.19166	-1.08643
CAGL0G00308g	2888414	SCW4	SCW4	Putative transglycosidase with a predicted role in the modification of 1,3-beta-glucan	-2.19103	-1.30907	-1.64645	-1.44478	-1.37605
CAGL0F00297g	2887672		HOC1	Ortholog(s) have alpha-1,6-mannosyltransferase activity and alpha-1,6-mannosyltransferase complex localization	-1.51933	-1.20892	-1.07956	-1.01514	-1.00433
CAGL0I05126g	2889091		ILV1	Ortholog(s) have L-threonine ammonia-lyase activity, role in isoleucine biosynthetic process, threonine catabolic process, valine biosynthetic process and mitochondrion localization	-1.56642	-1.22912	-1.19449	-1.14264	-1.0759
CAGL0B03795g	2886561		SUI2	Ortholog(s) have role in mitotic cell cycle G1/S transition checkpoint, regulation of translational initiation in response to osmotic stress	-1.71672	-1.11625	-1.20303	-1.03534	-1.01026
CAGL0C02343g	2886858		ARB1	Ortholog(s) have ATPase activity, uncoupled activity, role in cellular response to drug, ribosomal small subunit export from nucleus and cytosol, nucleus, ribosome localization	-1.81238	1.26754	1.11529	1.74843	1.57462
CAGL0E00781g	2887452		SUP35	Ortholog(s) have protein heterodimerization activity, translation release factor activity and role in nuclear-transcribed mRNA catabolic process, deadenylation-dependent decay, translational termination	-1.58016	1.10318	1.04649	1.54886	1.30142
CAGL0M10197g	2891354		MRT4	Ortholog(s) have role in cellular response to drug, nuclear-transcribed mRNA catabolic process, rRNA processing, ribosomal large subunit assembly and nucleolus, nucleoplasm, preribosome, large subunit precursor localization	-1.52578	1.01785	1.04019	1.58027	1.43844
CAGL0F04433g	2887710	URA7	URA7	CTP synthase	-2.15619	1.0026	1.06966	1.26426	1.23485
CAGL0G02079g	2888296		RPL3	Ortholog(s) have role in ribosomal large subunit assembly and cell surface, cytosol, small-subunit processome localization	-1.9265	1.09384	1.01385	1.34646	1.25463
CAGL0F04719g	2887785		GSY2	Ortholog(s) have glycogen (starch) synthase activity, role in glycogen biosynthetic process and cytoplasm localization	-1.70205	-1.36373	-1.32514	-1.30697	-1.32783
CAGL0G01078g	2888247		RPL26A	Ortholog(s) have RNA binding, structural constituent of ribosome activity, role in cytoplasmic translation and cytosolic large ribosomal subunit, nucleolus localization	-2.10673	1.00486	1.14886	1.39022	1.24531
CAGL0H08734g	2888745		RPL43A	Ortholog(s) have cytosol localization	-2.12431	1.03827	1.10251	1.4157	1.13355
CAGL0D02090g	2887233	ASC1	ASC1	40S small subunit ribosomal protein	-1.89748	1.08603	1.13965	1.1528	1.14069
CAGL0J00165g	2889892		RPS25A	Ortholog(s) have structural constituent of ribosome activity and cytosolic small ribosomal subunit localization	-2.09206	1.06245	1.13185	1.03157	1.0876
CAGL0K06567g	2890441		RPL27B	Ortholog(s) have cytosol, nucleus localization	-1.68455	1.01566	1.07527	1.0226	1.16249
CAGL0E04994g	2887373		RPL9A	Ortholog(s) have structural constituent of ribosome activity, role in cytoplasmic translation and cytosolic large ribosomal subunit localization	-2.38315	-1.05426	-1.07628	-1.05999	-1.08266
CAGL0F02937g	2887769		RPL12B	Ortholog(s) have role in ribosomal large subunit assembly and cytosol, nucleolus localization	-1.53666	1.07026	1.02853	1.10239	1.12941
CAGL0M12408g	2891432		RPL34B	Ortholog(s) have cytosol, nucleolus localization	-1.88149	1.06554	1.00128	1.1246	1.12123
CAGL0L10978g	2891020		CAF20	Ortholog(s) have translation regulator activity, role in negative regulation of translation, positive regulation of cytoplasmic mRNA processing body assembly and mRNA cap binding complex localization	-1.5535	1.05819	1.23118	1.17262	1.00037
CAGL0F06413g	2887784		FET3	Ortholog(s) have ferroxidase activity, iron ion transmembrane transporter activity and role in ferrous iron import, high-affinity iron ion transport, iron assimilation by reduction and transport, response to copper ion	-2.57561	-1.50856	-1.76601	-1.44582	-1.04195
CAGL0J11748g	2889464	PLB2	PLB2	Putative phospholipase B; predicted GPI-anchor	-2.17833	-1.71397	-1.68042	-1.76668	-1.53428
CAGL0A04015g	2886436		NOP56	Ortholog(s) have role in rRNA processing and 90S preribosome, box C/D snoRNP complex, small-subunit processome localization	-2.69684	1.14086	-1.08305	1.95495	1.55608
CAGL0I03234g	2889170		SNU13	Ortholog(s) have RNA binding activity and role in maturation of SSU-rRNA from tricistronic rRNA transcript (SSU-rRNA, 5.8S rRNA, LSU-rRNA), nuclear mRNA splicing, via spliceosome	-2.52914	1.01522	-1.2812	1.87227	1.3224
CAGL0I09790g	2888946		NOP58	Ortholog(s) have role in endonucleolytic cleavage in 5'-ETS of tricistronic rRNA transcript (SSU-rRNA, 5.8S rRNA and LSU-rRNA)	-1.74046	1.07769	-1.02939	1.99094	1.58614
CAGL0B01203g	2886683		RPL37A	Ortholog(s) have cytosol localization	-1.90015	1.25946	-1.00599	1.4868	1.24744
CAGL0D00616g	2887139		RPL31A	Ortholog(s) have structural constituent of ribosome activity, role in cytoplasmic translation, regulation of translational fidelity and cytosolic large ribosomal subunit localization	-2.24838	1.05373	-1.13977	1.34381	1.19156
CAGL0A01540g	2886362		RPL30	Ortholog(s) have pre-mRNA 5'-splice site binding, structural constituent of ribosome activity, role in negative regulation of nuclear mRNA splicing, via spliceosome, rRNA processing and cytosol localization	-2.47704	1.04206	-1.15329	1.4689	1.25709
CAGL0E05500g	2887566		RPA190	Ortholog(s) have DNA-directed RNA polymerase activity	-2.24442	1.09671	-1.04052	1.48065	1.29892
CAGL0D00858g	2887176		RPS29B	Ortholog(s) have structural constituent of ribosome activity and cytosolic small ribosomal subunit, nucleus localization	-1.82611	1.00925	-1.02967	1.13951	1.23457
CAGL0E01991g	2887407		RPS19A	Ortholog(s) have structural constituent of ribosome activity, role in rRNA export from nucleus, ribosomal small subunit biogenesis and cytosolic small ribosomal subunit, nucleus localization	-1.90185	1.0626	-1.0238	1.1759	1.31573
CAGL0G05940g	2888402		RPL42B	Ortholog(s) have cytosol localization	-2.10144	1.12834	-1.13189	1.24951	1.42289
CAGL0A03168g	2886331		RPP2B	60S acidic ribosomal protein	-1.8127	1.03502	-1.0138	1.28684	1.28805
CAGL0J02816g	2889736		TPA1	Ortholog(s) have poly(A) RNA binding activity	-2.0956	1.04124	-1.23858	1.44397	1.38184
CAGL0G00154g	2888412		ZUO1	Ortholog(s) have role in rRNA processing, regulation of translational fidelity, ribosomal subunit export from nucleus and cytosol, mitochondrion, nucleolus, polysome, ribosome localization	-2.12818	1.14127	-1.05474	1.07457	1.22972
CAGL0H04521g	2888848		RPL32	Ortholog(s) have structural constituent of ribosome activity, role in translation and cytosolic large ribosomal subunit, nucleus localization	-2.09802	1.07338	-1.1074	1.05755	1.23706
CAGL0H05511g	2888571		RPS9A	Ortholog(s) have rRNA binding, structural constituent of ribosome activity and role in maturation of SSU-rRNA from tricistronic rRNA transcript (SSU-rRNA, 5.8S rRNA, LSU-rRNA)	-1.97458	1.09437	-1.09432	1.06917	1.04075
CAGL0M06523g	2891679		RPL21A	Ortholog(s) have cytosol localization (ribosomal subunit)	-1.82365	1.15384	-1.04267	1.12197	1.11893
CAGL0E03938g	2887334		RPL8A	Has domain(s) with predicted role in ribosome biogenesis and ribonucleoprotein complex localization	-2.27162	1.01695	-1.0454	1.2406	1.43208
CAGL0I00814g	2889041		RPP1A	Ortholog(s) have structural constituent of ribosome activity and ribosome localization	-2.35372	1.01808	-1.06233	1.11084	1.42883
CAGL0K03135g	2890223		RPS20	Ortholog(s) have role in maturation of SSU-rRNA from tricistronic rRNA transcript (SSU-rRNA, 5.8S rRNA, LSU-rRNA) and cytosolic small ribosomal subunit localization	-2.37447	1.06048	-1.05996	1.22249	1.50632
CAGL0K11748g	2890530	RPS11B	RPS11A	Protein component of the small (40S) ribosomal subunit; expression upregulated in biofilm vs planktonic cell culture	-2.41711	1.02039	-1.00168	1.0949	1.1459
CAGL0D03718g	2887184	TIF5	TIF5	Translation initiation factor eIF5	-1.55932	1.03915	-1.07257	1.01157	1.0759
CAGL0F07073g	2887640		RPS2	Ortholog(s) have SSU rRNA binding, structural constituent of ribosome activity, role in positive regulation of translational fidelity, rRNA export from nucleus and cytosolic small ribosomal subunit, small-subunit processome localization	-1.50571	1.00076	-1.03376	1.04439	1.08008
CAGL0G04851g	2888002		SUR4	Ortholog(s) have fatty acid elongase activity, role in fatty acid elongation, post-Golgi vesicle-mediated transport, sphingolipid biosynthetic process and endoplasmic reticulum localization	-1.53559	1.03557	-1.02914	1.04422	1.02894
CAGL0G02409g	2888185		SRP40	Ortholog(s) have nucleolus localization	-1.62257	1.08947	-1.12501	1.31851	1.29762
CAGL0J03718g	2889686		PUS7	Ortholog(s) have pseudouridine synthase activity, role in enzyme-directed rRNA pseudouridine synthesis, snRNA pseudouridine synthesis, tRNA pseudouridine synthesis and nucleus localization	-1.55442	1.00809	-1.09878	1.2138	1.19904
CAGL0L11792g	2890944		PAB1	Ortholog(s) have poly(A) RNA binding activity and role in mRNA export from nucleus, regulation of nuclear-transcribed mRNA poly(A) tail shortening, regulation of translational initiation	-1.55591	1.04752	-1.0404	1.17598	1.119
CAGL0M06501g	2891678		RPS9B	Ortholog(s) have structural constituent of ribosome activity and role in maturation of SSU-rRNA from tricistronic rRNA transcript (SSU-rRNA, 5.8S rRNA, LSU-rRNA), positive regulation of translational fidelity	-1.8845	1.02416	-1.16871	1.22778	1.12717
CAGL0L03846g	2890547		DBP2	Ortholog(s) have role in nuclear-transcribed mRNA catabolic process, nonsense-mediated decay, rRNA processing and cytosol, mitochondrion, nucleolus localization	-1.85777	1.03835	-1.17081	1.48228	1.32147
CAGL0M13519g	2891222		HAS1	Ortholog(s) have ATP-dependent RNA helicase activity, RNA binding activity, role in rRNA processing, ribosomal small subunit biogenesis and 90S preribosome, nuclear envelope, nucleolus, preribosome, large subunit precursor localization	-2.17755	1.05833	-1.54095	1.60473	1.49472
CAGL0M09977g	2891344		DUS3	Ortholog(s) have role in tRNA modification and cytoplasm, nucleus localization	-1.52904	1.01887	-1.20005	1.11994	1.33952
CAGL0E03245g	2887274		NSR1	Ortholog(s) have RNA binding, single-stranded DNA binding activity, role in single-species biofilm formation on inanimate substrate and mitochondrion, nucleus localization	-2.14337	-1.30767	-1.22019	1.34461	1.55966
CAGL0F01705g	2887944	FRS1	FRS1	Putative cytosolic phenylalanyl-tRNA synthetase, alpha subunit	-1.72913	-1.06084	-1.06658	1.02612	1.20469
CAGL0G03575g	2888305		RPL23B	Has domain(s) with predicted structural constituent of ribosome activity, role in translation and ribosome localization; evidence for a extended second exon by 2 amino acids	-2.06627	-1.03725	-1.04788	1.24838	1.36004
CAGL0J01848g	2889810		RPA135	Ortholog(s) have DNA-directed RNA polymerase activity, role in transcription of nuclear large rRNA transcript from RNA polymerase I promoter and DNA-directed RNA polymerase I complex localization	-2.27491	-1.07406	-1.07918	1.76778	2.0302
CAGL0J10384g	2889601		RPL28	Ortholog(s) have RNA binding activity and mitochondrion, nucleus localization	-2.04346	-1.1648	-1.22376	1.05242	1.20778
CAGL0A04037g	2886378		PWP1	Ortholog(s) have role in rRNA processing and cytosol, nucleolus localization	-2.00175	-1.02488	-1.06305	1.54873	1.41582
CAGL0K06061g	2890451		RPS28B	Ortholog(s) have structural constituent of ribosome activity	-2.08982	-1.14667	-1.18295	1.27597	1.20303
CAGL0B01122g	2886539	SAM1	SAM1	S-adenosylmethionine synthetase	-1.94088	-1.13909	-1.09177	1.09689	1.13608
CAGL0J11220g	2889490		RPS3	Ortholog(s) have DNA-(apurinic or apyrimidinic site) lyase activity, structural constituent of ribosome activity and role in rRNA export from nucleus	-1.88469	-1.04408	-1.01659	1.29446	1.29906
CAGL0J07238g	2889575	RPS12	RPS12	40S ribosomal protein S12; protein abundance decreased in ace2 mutant cells	-1.84208	-1.02753	-1.0491	1.04666	1.0667
CAGL0J00737g	2889865		RPS27B	Ortholog(s) have structural constituent of ribosome activity	-1.84024	-1.01425	-1.01427	1.37048	1.34554
CAGL0C05181g	2886791		PRS5	Ortholog(s) have ribose phosphate diphosphokinase activity, role in 5-phosphoribose 1-diphosphate biosynthetic process, fungal-type cell wall organization and cytoplasm localization	-1.85898	-1.19463	-1.14618	1.18312	1.05975
CAGL0L10560g	2891037	PDR13	SSZ1	Protein with a predicted role in pleiotropic drug resistance	-1.83553	-1.08684	-1.06453	1.38801	1.35495
CAGL0K02541g	2890262		PRS3	Ortholog(s) have ribose phosphate diphosphokinase activity, role in 5-phosphoribose 1-diphosphate biosynthetic process, cellular response to drug, fungal-type cell wall organization, regulation of cell size and cytoplasm localization	-1.88884	-1.13961	-1.075	1.31757	1.15204
CAGL0H02409g	2888488		TIF11	Ortholog(s) have RNA strand annealing activity, role in cellular response to drug and cytosol, nucleus localization	-1.66897	-1.00417	-1.22872	1.0822	1.00827
CAGL0G07106g	2888030	APT1	APT1	Putative adenine phosphoribosyltransferase; protein abundance decreased in ace2 mutant cells	-1.82512	-1.03468	-1.32212	1.3654	1.17519
CAGL0I00594g	2889320		GSP1	Ortholog(s) have GTP binding, GTPase activity	-1.80689	-1.00695	-1.25274	1.29522	1.09104
CAGL0H07249g	2888516	DYS1	DYS1	Putative deoxyhypusine synthase	-1.89506	-1.2672	-1.32918	1.20755	1.12293
CAGL0K01859g	2890032		NOP1	Ortholog(s) have mRNA binding, methyltransferase activity, role in box C/D snoRNA 3'-end processing, rRNA methylation and 90S preribosome, box C/D snoRNP complex, nuclear chromosome, ribosome, small-subunit processome, spindle localization	-1.78251	-1.02588	-1.14215	1.33547	1.24702
CAGL0J10032g	2889431		NOP2	Ortholog(s) have nucleus, preribosome, large subunit precursor localization	-1.95974	-1.20203	-1.34857	1.16647	1.12642
CAGL0L00341g	2891116		EBP2	Ortholog(s) have role in nuclear division, rRNA processing and nuclear periphery, nucleolus, preribosome, large subunit precursor, spindle pole body localization	-1.73585	-1.04155	-1.14752	1.15706	1.10536
CAGL0L06314g	2890758		ARX1	Ortholog(s) have role in ribosomal large subunit biogenesis and cytosol, cytosolic large ribosomal subunit, nuclear envelope, nucleoplasm localization	-1.80653	-1.03579	-1.11906	1.32003	1.39474
CAGL0D03190g	2887261	MEU1	MEU1	Ortholog(s) have S-methyl-5-thioadenosine phosphorylase activity, mRNA binding activity, role in L-methionine salvage from methylthioadenosine, glutamate biosynthetic process and cytosol, nucleus localization	-1.5226	-1.04586	-1.00282	1.12996	1.2372
CAGL0H03685g	2888607		CBF5	Ortholog(s) have pseudouridine synthase activity, role in box H/ACA snoRNA 3'-end processing, rRNA pseudouridine synthesis, snRNA pseudouridine synthesis and 90S preribosome, box H/ACA snoRNP complex, cytosol localization	-1.68014	-1.09405	-1.02651	1.38555	1.46891
CAGL0I04730g	2889362	HMT1	HMT1	Putative hnRNP arginine N-methyltransferase	-1.64604	-1.22228	-1.28428	1.03121	1.05188
CAGL0H09724g	2888761		NUG1	Ortholog(s) have GTPase activity, RNA binding activity and role in cell division, positive regulation of growth rate, rRNA processing, response to drug, ribosomal large subunit export from nucleus	-1.70813	-1.15347	-1.24349	1.21754	1.2618
CAGL0K09614g	2890240		KRE33	Ortholog(s) have role in negative regulation of G0 to G1 transition, ribosomal small subunit biogenesis and 90S preribosome, nucleolus localization	-1.66772	-1.08219	-1.1545	1.36226	1.43893
CAGL0J04928g	2889562		MTR4	Ortholog(s) have ATP-dependent 3'-5' RNA helicase activity, poly(A) RNA binding activity	-1.54104	-1.08795	-1.00029	1.09655	1.35216
CAGL0J05984g	2889775		AAH1	Ortholog(s) have adenine deaminase activity, role in adenine catabolic process, hypoxanthine salvage and cytosol, nucleus localization	-1.62036	-1.09409	-1.10036	1.24518	1.63025
CAGL0H03773g	2888608		RLP7	Ortholog(s) have role in exonucleolytic trimming to generate mature 5'-end of 5.8S rRNA from tricistronic rRNA transcript (SSU-rRNA, 5.8S rRNA and LSU-rRNA),	-1.62535	-1.31172	-1.06907	1.36252	1.23406
CAGL0H10604g	2888479	PUB1	PUB1	Putative major polyadenylated RNA-binding protein of nucleus and cytoplasm; protein abundance decreased in ace2 mutant cells	-1.59624	-1.2361	-1.01616	1.21378	1.16505
CAGL0L02915g	2890837		DED1	Ortholog(s) have ATP-dependent RNA helicase activity, RNA strand annealing activity	-1.77781	-1.27522	-1.05413	1.12732	1.00511
CAGL0D00550g	2887109		PRS1	Ortholog(s) have ribose phosphate diphosphokinase activity, role in 5-phosphoribose 1-diphosphate biosynthetic process, fungal-type cell wall organization and cytosol, nucleus localization	-1.55707	-1.02662	-1.11071	1.42127	1.33213
CAGL0G07535g	2888429		RRS1	Ortholog(s) have role in cellular response to drug, endonucleolytic cleavage in ITS1 to separate SSU-rRNA from 5.8S rRNA and LSU-rRNA from tricistronic rRNA transcript (SSU-rRNA, 5.8S rRNA and LSU-rRNA),	-1.51294	-1.02927	-1.15718	1.24821	1.14965
CAGL0B00792g	2886602		SRO9	Ortholog(s) have RNA binding activity, role in cytoplasmic translation and polysome localization	-1.58987	-1.02712	-1.21334	1.2266	1.16454
CAGL0H05709g	2888702		NOG1	Ortholog(s) have role in cellular response to drug, rRNA processing, ribosomal large subunit biogenesis, ribosomal subunit export from nucleus and nucleolus, preribosome, large subunit precursor, spindle localization	-1.80845	-1.12497	-1.37176	1.54872	1.42263
CAGL0F00407g	2887799		LIA1	Ortholog(s) have deoxyhypusine monooxygenase activity	-1.55051	-1.1465	-1.31361	1.15929	1.13332
CAGL0J10890g	2889514		SSF2	Ortholog(s) have rRNA binding activity, role in conjugation with cellular fusion, ribosomal large subunit assembly and nucleolus localization	-1.59983	-1.19416	-1.31588	1.02026	1.01669
CAGL0L11660g	2890975		RPO31	Ortholog(s) have DNA-directed RNA polymerase activity, role in tRNA transcription from RNA polymerase III promoter and DNA-directed RNA polymerase III complex, cytoplasm localization	-1.66692	-1.1845	-1.30167	1.65523	1.54739
CAGL0H03377g	2888822	DBP3	DBP3	Ortholog(s) have RNA-dependent ATPase activity and role in endonucleolytic cleavage in ITS1 upstream of 5.8S rRNA from tricistronic rRNA transcript (SSU-rRNA, 5.8S rRNA, LSU-rRNA)	-1.78357	-1.11619	-1.47757	1.23732	1.13094
CAGL0K01551g	2890018		DBP10	Ortholog(s) have role in maturation of 5.8S rRNA from tricistronic rRNA transcript (SSU-rRNA, 5.8S rRNA, LSU-rRNA), maturation of LSU-rRNA from tricistronic rRNA transcript (SSU-rRNA, 5.8S rRNA, LSU-rRNA)	-1.70054	-1.19201	-1.48989	1.16374	1.00986
CAGL0J00473g	2889876		CIC1	Ortholog(s) have protein binding, bridging activity, role in protein catabolic process, ribosomal large subunit biogenesis and nucleolus, preribosome, large subunit precursor, proteasome complex localization	-1.50485	-1.14519	-1.29576	1.54219	1.22536
CAGL0I08547g	2888924		YER156c	Ortholog(s) have cytosol, nucleus localization	-1.52527	-1.07677	-1.16986	1.59048	1.20313
CAGL0G04411g	2888167		UTP10	Ortholog(s) have snoRNA binding activity	-1.56295	-1.01573	-1.2674	1.44171	1.16135
CAGL0L08756g	2890633		RRP12	Ortholog(s) have 90S preribosome, nucleus, spindle pole body localization	-1.6645	-1.05641	-1.23249	1.60006	1.27518
CAGL0J09614g	2889715		NHP2	Ortholog(s) have box H/ACA snoRNA binding activity, role in cleavage involved in rRNA processing, rRNA pseudouridine synthesis, snRNA pseudouridine synthesis and box H/ACA snoRNP complex localization	-1.52881	-1.22098	-1.41381	1.06471	1.12164
CAGL0L04950g	2890714		ERB1	Ortholog(s) have role in cellular response to drug, rRNA processing, ribosomal large subunit biogenesis and PeBoW complex, preribosome, large subunit precursor localization	-1.51068	-1.29767	-1.27629	1.34939	1.17919
CAGL0G07843g	2888380		NOP7	Ortholog(s) have role in cell cycle, cellular response to drug, cellular response to starvation and filamentous growth of a population of unicellular organisms in response to starvation	-1.73771	-1.12998	-1.11938	1.753	1.3298
CAGL0M04829g	2891567		RRP5	Ortholog(s) have poly(U) RNA binding activity	-1.84088	-1.00709	-1.27307	1.79443	1.28587
CAGL0E02013g	2887401		RPL18A	Ortholog(s) have cytosol localization	-2.42069	-1.01066	-1.20907	1.52945	1.36403
CAGL0G03443g	2888192		KAP123	Ortholog(s) have nuclear localization sequence binding, protein transporter activity and role in NLS-bearing substrate import into nucleus, regulation of pseudohyphal growth, ribosomal protein import into nucleus	-2.41882	-1.01738	-1.06348	1.35268	1.2799
CAGL0K01991g	2890330		NCL1	Ortholog(s) have tRNA (cytosine-5-)-methyltransferase activity, role in tRNA methylation and nucleus localization	-2.70631	-1.08501	-1.15774	1.6794	1.39917
CAGL0K06149g	2890455		RPS17B	Ortholog(s) have role in ribosomal small subunit assembly and cytosol localization	-2.74181	-1.07485	-1.15692	1.37886	1.10107
CAGL0A00979g	2886413		RPL38	Ortholog(s) have cytosol localization	-2.62777	-1.00408	-1.11981	1.38212	1.52479
CAGL0G01826g	2888415		RPL11A	Ortholog(s) have role in ribosomal large subunit assembly and cytosol localization	-2.38464	-1.18523	-1.09222	1.2815	1.29227
CAGL0G08173g	2888200		RPS31	Ortholog(s) have protein tag, structural constituent of ribosome activity and role in maturation of SSU-rRNA from tricistronic rRNA transcript (SSU-rRNA, LSU-rRNA,5S), protein ubiquitination, ribosomal small subunit assembly	-2.39085	-1.08683	-1.19407	1.09994	1.28747
CAGL0M02497g	2891463		RPL33A	Ortholog(s) have structural constituent of ribosome activity, role in cytoplasmic translation and cytosolic large ribosomal subunit localization	-2.35241	-1.25992	-1.20491	1.0299	1.28643
CAGL0M11616g	2891240		MDN1	Ortholog(s) have role in rRNA processing, ribosomal large subunit assembly and mitochondrion, nucleoplasm, spindle pole body localization	-2.28854	-1.0841	-1.09588	1.23036	1.49402
CAGL0L11462g	2890966		RPL6A	Ortholog(s) have RNA binding, structural constituent of ribosome activity, role in cytoplasmic translation, ribosomal large subunit assembly and cytosolic large ribosomal subunit, nucleolus localization	-2.38283	-1.07238	-1.40199	1.11335	1.29069
CAGL0G07227g	2888173		RPS18B	Ortholog(s) have role in endonucleolytic cleavage in ITS1 to separate SSU-rRNA from 5.8S rRNA and LSU-rRNA from tricistronic rRNA transcript (SSU-rRNA, 5.8S rRNA, LSU-rRNA), rRNA export from nucleus	-2.65734	-1.09468	-1.02876	1.12104	1.21735
CAGL0F03927g	2887636		GUA1	Ortholog(s) have GMP synthase (glutamine-hydrolyzing) activity, role in GMP biosynthetic process and cytosol, soluble fraction localization	-3.25236	-1.15863	-1.04185	1.56704	1.70197
CAGL0K08382g	2890354		RPS21A	Ortholog(s) have structural constituent of ribosome activity	-2.85926	-1.12918	-1.06617	1.15525	1.25263
CAGL0L06886g	2890821		RPL13A	Ortholog(s) have cell surface, cytosol localization	-3.0883	-1.00747	-1.02717	1.37924	1.27163
CAGL0D02662g	2887062		HXT2	Has domain(s) with predicted role in transmembrane transport and integral to membrane localization	-2.18352	-1.57302	-1.3276	-1.03251	-1.62429
CAGL0I01430g	2888956		ANB1	Ortholog(s) have cytosol, nucleolus localization	-1.75805	-1.10265	1.04047	1.09286	-1.07045
CAGL0K09724g	2890244	FPR1	FPR1	Peptidyl-prolyl cis-trans isomerase; expression upregulated in biofilm vs planktonic cell culture	-1.5091	-1.18605	1.13403	1.13163	-1.00406
CAGL0D02640g	2886983		HXT2	Has domain(s) with predicted role in transmembrane transport and integral to membrane localization	-2.04944	-1.92286	-1.50449	-1.09132	-1.47705
CAGL0A01562g	2886312		RPL24A	Ortholog(s) have RNA binding activity	-2.18329	-1.02542	1.03532	1.21459	1.17472
CAGL0M10241g	2891356		RPL14A	Ortholog(s) have RNA binding activity and cytosol, nucleus localization	-2.03366	-1.09012	1.02984	1.15144	1.11828
CAGL0G05027g	2887982		RPS13	Ortholog(s) have SSU rRNA binding, structural constituent of ribosome activity and role in maturation of SSU-rRNA from tricistronic rRNA transcript (SSU-rRNA, 5.8S rRNA, LSU-rRNA)	-2.57905	-1.06099	1.06515	1.51659	1.68301
CAGL0I00792g	2889042		RPS16A	Ortholog(s) have role in maturation of SSU-rRNA from tricistronic rRNA transcript (SSU-rRNA, 5.8S rRNA, LSU-rRNA) and 90S preribosome, cytosol localization	-2.63473	-1.05175	1.05648	1.26615	1.43406
CAGL0L04840g	2890709		RPS23A	Ortholog(s) have structural constituent of ribosome activity and role in maturation of SSU-rRNA from tricistronic rRNA transcript (SSU-rRNA, 5.8S rRNA, LSU-rRNA), regulation of translational fidelity	-2.28824	-1.06435	1.02858	1.14141	1.27825
CAGL0J03234g	2889732		RPS24A	Ortholog(s) have role in maturation of SSU-rRNA from tricistronic rRNA transcript (SSU-rRNA, 5.8S rRNA, LSU-rRNA) and cytosol, mitochondrion, nucleolus localization	-3.23582	-1.06507	1.01966	1.1549	1.09223
CAGL0I10494g	2889245		FHN1	Ortholog(s) have role in establishment of protein localization in plasma membrane and Golgi apparatus, RNA polymerase transcription factor SL1 complex, membrane raft localization	-1.53234	-1.12177	1.0642	1.18853	1.02342
CAGL0L09669g	2891075		URB1	Ortholog(s) have role in maturation of 5.8S rRNA from tricistronic rRNA transcript (SSU-rRNA, 5.8S rRNA, LSU-rRNA), maturation of LSU-rRNA from tricistronic rRNA transcript (SSU-rRNA, 5.8S rRNA, LSU-rRNA)	-1.51235	-1.18056	1.03639	1.2641	1.14871
CAGL0M04279g	2891542		DIP2	Ortholog(s) have snoRNA binding activity	-1.52121	-1.13378	1.00057	1.15826	1.24963
CAGL0L01551g	2890880		SUR7	Ortholog(s) have role in ascospore formation, cellular response to biotic stimulus, cellular response to chemical stimulus, cellular response to glucose starvation and cellular response to neutral pH	-1.52087	-1.45432	-1.22363	-1.19302	-1.28046
CAGL0H04653g	2888522	ERG6	ERG6	C24 sterol methyltransferase; mutation confers resistance to amphotericin B and nystatin and increased sensitivity to azoles	-2.04298	-1.1846	-1.15271	1.3444	-1.0068
CAGL0E03850g	2887279		SDH２	Ortholog(s) have cytoplasm localization	-1.77133	-1.13285	-1.1456	1.24318	-1.00804
CAGL0L03289g	2890726		UTH1	Ortholog(s) have role in fungal-type cell wall biogenesis, fungal-type cell wall organization, mitochondrion degradation and cell surface, extracellular region, fungal-type cell wall localization	-1.79941	-1.10638	-1.18745	1.02053	-1.07205
CAGL0K11880g	2889959		MRH1	Ortholog(s) have mitochondrion, plasma membrane, plasma membrane enriched fraction localization	-1.74942	-1.60017	-1.68438	-1.30857	-1.62464
CAGL0E02255g	2887549		ZEO1	Ortholog(s) have role in fungal-type cell wall organization, response to stress and extrinsic to plasma membrane, mitochondrial outer membrane, plasma membrane enriched fraction localization	-2.52932	-1.36042	-2.05119	-1.49451	-1.80961
CAGL0L01353g	2890873		HYP2	Ortholog(s) have ribosome binding, translation elongation factor activity, translation initiation factor activity	-1.75731	1.06011	-1.11219	1.06997	-1.00744
CAGL0L12870g	2890578		TMA19	Ortholog(s) have role in cellular response to oxidative stress, cytoplasmic translation and cytosol, mitochondrion, nucleus, ribosome localization	-1.87221	1.20929	-1.06644	1.01716	-1.18154
CAGL0F05115g	2887641		YLR413W	Ortholog of S. cerevisiae : YLR413W	-1.73838	-1.17447	-1.34509	-1.57766	-1.27199
CAGL0G08734g	2888092		RPL9B	Ortholog(s) have structural constituent of ribosome activity, role in cytoplasmic translation and cytosolic large ribosomal subunit, nucleus localization	-1.65718	-1.0751	-1.15681	-1.50454	-1.15176
CAGL0C01947g	2886802		GUS1	Ortholog(s) have glutamate-tRNA ligase activity, role in glutamyl-tRNA aminoacylation and cytosol, methionyl glutamyl tRNA synthetase complex, mitochondrion, nucleus localization	-1.54417	1.09197	1.01897	-1.0363	1.02194
CAGL0G09713g	2888260		RPS30B	Ortholog(s) have cytosol, nucleus localization	-1.57856	1.08039	1.11653	-1.05254	1.11397
CAGL0K07414g	2890375		RPL20A	Ortholog(s) have cytosol, nucleolus localization	-1.57176	1.05076	1.01065	-1.00882	1.12456
CAGL0L04510g	2890641		RPS28A	Ortholog(s) have structural constituent of ribosome activity	-1.76581	1.04687	1.05702	-1.14816	1.12578
CAGL0G09130g	2888043		RPL7B	Ortholog(s) have cytoplasm, nucleolus localization	-2.07117	1.00272	-1.01923	-1.03125	1.29248
CAGL0B04257g	2886612		RPL4B	Ortholog(s) have cell surface, cytosol, membrane fraction localization	-1.72876	1.13399	-1.06425	-1.14392	1.05328
CAGL0D01826g	2887194		GCN1	Ortholog(s) have role in regulation of translational elongation and cytosolic ribosome, mitochondrion localization	-1.73565	1.01062	-1.03866	-1.06419	1.1155
CAGL0K10780g	2890108		IMD4	Ortholog(s) have IMP dehydrogenase activity	-1.808	1.0613	-1.00578	-1.05334	1.14516
CAGL0M08118g	2891258		RPL17A	Ortholog(s) have structural constituent of ribosome activity, role in cytoplasmic translation and cytosolic large ribosomal subunit localization	-1.83187	1.03992	-1.05143	-1.04216	1.14312
CAGL0J09086g	2889942		RPL35B	Ortholog(s) have role in maturation of LSU-rRNA from tricistronic rRNA transcript (SSU-rRNA, 5.8S rRNA, LSU-rRNA) and cytosol, nucleolus, preribosome, large subunit precursor localization	-1.82408	1.02431	-1.01558	-1.0234	1.26881
CAGL0A03278g	2886486		RPL19A	Ortholog(s) have cell surface, cytosol localization	-2.80856	1.06375	-1.05839	-1.21782	1.07838
CAGL0M04873g	2891569		RPS10A	Ortholog(s) have role in rRNA export from nucleus and cell surface, cytosol localization	-2.74579	1.00162	-1.05307	-1.14083	1.10062
CAGL0G07623g	2888341		APE3	Ortholog(s) have aminopeptidase activity, role in vacuolar protein catabolic process and fungal-type vacuole localization	-1.76364	-2.48208	-2.67924	-3.26856	-1.2947
CAGL0F03883g	2887679	GAS4	GAS3	Putative glycoside hydrolase of the Gas/Phr family; predicted GPI-anchor	-1.8623	-2.0906	-1.98357	-1.79018	-1.00676
CAGL0F00759g	2887973		PMT3	Ortholog(s) have dolichyl-phosphate-mannose-protein mannosyltransferase activity and role in protein O-linked glycosylation	-1.52684	-1.54478	-1.64984	-1.46036	-1.01367
CAGL0J11770g	2889465		PLB1	Putative phospholipase B; predicted GPI-anchor	-1.77345	-1.90475	-2.37191	-1.67433	1.15605
CAGL0L12804g	2890611		MNN9	Ortholog(s) have alpha-1,6-mannosyltransferase activity, mannosyltransferase activity	-1.51131	-1.25102	-1.68052	-1.1947	1.1322
CAGL0D05742g	2887013		OST1	Ortholog(s) have dolichyl-diphosphooligosaccharide-protein glycotransferase activity, role in protein N-linked glycosylation via asparagine and oligosaccharyltransferase complex, plasma membrane localization	-1.55391	-1.34498	-1.41726	-1.32959	-1.02199
CAGL0G02453g	2888413		PTR2	Ortholog(s) have dipeptide transporter activity, tripeptide transporter activity, role in dipeptide transport, tripeptide transport and fungal-type vacuole, integral to plasma membrane, membrane fraction localization	-2.02003	-1.4596	-1.3082	-1.03254	1.04253
CAGL0E03289g	2887276		TIF4631	Ortholog(s) have role in ribosomal large subunit biogenesis, stress granule assembly and cytoplasmic stress granule, eukaryotic translation initiation factor 4F complex, mitochondrion localization	-2.16522	-1.13458	-1.05688	-1.0324	1.3535
CAGL0J10164g	2889412	RPL16A	RPL16B	Putative ribosomal protein	-2.08185	-1.15726	-1.09455	-1.10036	1.19316
CAGL0H09064g	2888801	FUR1	FUR1	Putative uracil phosphoribosyltransferase	-2.34578	-1.10732	-1.26477	-1.04615	1.14086
CAGL0G00220g	2888394		BGL2	Ortholog(s) have 1,3-beta-glucanosyltransferase activity, glucan endo-1,3-beta-D-glucosidase activity and role in adhesion to host, fungal-type cell wall organization, growth of symbiont in host, pathogenesis	-1.53092	-1.63229	-1.57568	-1.45635	1.17543
CAGL0I04532g	2889032		MNN2	Ortholog(s) have alpha-1,2-mannosyltransferase activity, role in protein glycosylation and Golgi apparatus localization	-1.65956	-1.67264	-1.64794	-1.53288	1.06656
CAGL0B01683g	2886642		TMN2	Ortholog(s) have role in cellular copper ion homeostasis, invasive growth in response to glucose limitation, pseudohyphal growth, vacuolar transport and Golgi apparatus, fungal-type vacuole membrane localization	-1.50825	-1.59538	-1.22465	-1.33541	1.12212
CAGL0H01727g	2888494	EUG1	EUG1	Putative protein disulfide isomerase	-2.16356	-2.03438	-1.8036	-2.05501	1.01878
CAGL0L02365g	2890903		WBP1	Ortholog(s) have dolichyl-diphosphooligosaccharide-protein glycotransferase activity, role in cell cycle, protein N-linked glycosylation and nuclear envelope, oligosaccharyltransferase complex, plasma membrane localization	-1.51952	-1.42352	-1.22222	-1.33659	1.00431
CAGL0L01243g	2890918		GDA1	Ortholog(s) have guanosine-diphosphatase activity, nucleotide diphosphatase activity, uridine-diphosphatase activity	-2.01394	-1.73363	-1.81777	-1.94636	1.09859
CAGL0L07172g	2890834		PMT5	Has domain(s) with predicted mannosyltransferase activity, role in protein O-linked glycosylation and membrane localization	-1.53745	-1.38368	-1.39869	-1.56404	1.12393
CAGL0E05874g	2887443		BMS1	Ortholog(s) have GTP binding, GTPase activity, U3 snoRNA binding activity, role in cellular response to drug, rRNA processing, ribosome assembly and 90S preribosome, mitochondrion, nucleolus, spindle localization	-1.73456	-1.17288	-1.47197	-1.03754	1.08108
CAGL0D04114g	2887077	NCP1	NCP1	Ortholog(s) have NADPH-hemoprotein reductase activity, electron carrier activity, role in cellular response to drug, ergosterol biosynthetic process and endoplasmic reticulum, microsome, mitochondrial outer membrane localization	-1.82442	-1.36023	-1.41719	-1.1259	1.04356
CAGL0L11506g	2890968		HMG1	Ortholog(s) have hydroxymethylglutaryl-CoA reductase (NADPH) activity and role in cellular response to drug, ergosterol biosynthetic process, fungal-type cell wall organization, oxidation-reduction process	-1.71986	-1.33803	-1.48892	-1.07206	1.06855
CAGL0M13849g	2891237	GAS2	GAS1	Putative glycoside hydrolase of the Gas/Phr family; predicted GPI-anchor	-2.12574	-1.60337	-1.83969	-1.68467	1.04499
CAGL0H07403g	2888463		KRE2	Ortholog(s) have alpha-1,2-mannosyltransferase activity	-1.59051	-1.56833	-1.41535	-1.08606	1.38038
CAGL0A00209g	2886291		STT3	Ortholog(s) have dolichyl-diphosphooligosaccharide-protein glycotransferase activity, role in protein N-linked glycosylation and oligosaccharyltransferase complex, plasma membrane localization	-1.55457	-1.27251	-1.17405	-1.08862	1.16605
CAGL0L10164g	2891060		ETT1	Ortholog(s) have role in translational termination and nucleus localization	-1.56038	-1.28965	-1.25546	-1.1189	1.02075
CAGL0L07216g	2890979		PMT1	Ortholog(s) have dolichyl-phosphate-mannose-protein mannosyltransferase activity, protein heterodimerization activity	-1.6874	-1.37003	-1.30879	-1.2674	1.09806
CAGL0L13244g	2890595		EMP46	Ortholog(s) have glycoprotein binding activity, role in ER to Golgi vesicle-mediated transport and ER to Golgi transport vesicle, Golgi membrane, endoplasmic reticulum localization	-1.57943	-1.40607	-1.19373	-1.07144	1.18141
CAGL0F08547g	2887849	EFB1	EFB1	Translation elongation factor eEF1beta; protein abundance decreased in ace2 mutant cells	-1.68407	-1.10011	-1.1333	-1.0776	1.0302
CAGL0J08734g	2889674		PMT2	Ortholog(s) have dolichyl-phosphate-mannose-protein mannosyltransferase activity, protein heterodimerization activity	-2.23668	-1.5799	-1.4716	-1.54042	1.22291
CAGL0M02849g	2891478		RPS0B	Ribosomal protein S2	-1.55288	-1.07918	-1.0321	-1.01501	1.15569
CAGL0I04356g	2889047	TIF1	TIF2	Translation initiation factor eIF4A	-1.76236	-1.02474	-1.04984	-1.14188	1.198
CAGL0M13893g	2891610		NIP1	Ortholog(s) have translation initiation factor activity and role in cellular response to drug, translational initiation	-1.68867	-1.00663	-1.04179	-1.25002	1.09598
CAGL0M05489g	2891632		KTR3	Ortholog(s) have mannosyltransferase activity, role in N-glycan processing, protein O-linked glycosylation and fungal-type vacuole localization	-1.52778	-1.37482	-1.29432	-1.39556	-1.04418
CAGL0M01826g	2891194	ECM33	ECM33	Ecm33-family protein with a predicted role in cell wall biogenesis and organization; predicted GPI-anchor	-2.32696	-1.74627	-2.29845	-1.89058	-1.03273
CAGL0G03091g	2888362		VAS1	Ortholog(s) have valine-tRNA ligase activity, role in valyl-tRNA aminoacylation and cytosol, mitochondrion localization	-1.67754	-1.14224	-1.2299	-1.47443	-1.3992
CAGL0H07579g	2888498	HXK2	HXK2	Putative hexokinase B	-1.92982	1.01579	1.00725	-1.22314	-1.22577
CAGL0L04400g	2890636		YRR1	Ortholog(s) have RNA polymerase II core promoter proximal region sequence-specific DNA binding, sequence-specific DNA binding RNA polymerase II transcription factor activity	-1.50954	-1.14814	-1.09085	-1.36695	-1.52321
CAGL0F00187g	2887595		FET4	Ortholog(s) have copper ion transmembrane transporter activity, iron ion transmembrane transporter activity	-2.39378	-1.62944	-1.17944	-1.53316	-1.98974
CAGL0I05566g	2889336		TIM23	Ortholog(s) have mitochondrion targeting sequence binding, protein channel activity, role in protein import into mitochondrial matrix and mitochondrial inner membrane presequence translocase complex, plasma membrane localization	-1.59775	-1.22162	-1.03178	-1.24413	-1.24052
CAGL0K02123g	2890336		RPS26B	Ortholog(s) have role in rRNA export from nucleus and cytosol localization	-1.84679	1.11605	1.0061	1.09969	-1.00184
CAGL0L02475g	2890908		GCN4	bZIP domain-containing protein	-1.52979	-1.14801	-1.22035	-1.21101	-1.38712
CAGL0I05060g	2889088		DOT6	Ortholog(s) have sequence-specific DNA binding activity and role in chromatin silencing at rDNA, chromatin silencing at telomere, filamentous growth, regulation of transcription from RNA polymerase II promoter, unidimensional cell growth	-1.77418	-1.05785	1.10452	-1.19211	-1.11696
CAGL0G00990g	2888316	RPP0	RPP0	Acidic ribosomal protein L10	-1.99694	-1.05013	1.06009	-1.19676	1.03474
CAGL0M00814g	2891604		RPS1A	Ortholog(s) have role in maturation of SSU-rRNA from tricistronic rRNA transcript (SSU-rRNA, 5.8S rRNA, LSU-rRNA) and 90S preribosome, cytosol localization	-1.60874	-1.0626	1.10535	-1.0404	1.23109
Green- colored columns shows the putative Ire1-regulated genes
