# Supplementary material for: Dissection of Ire1 Functions Reveals Stress Response Mechanisms Uniquely Evolved in Candida glabrata
Source: PLoS Pathog. 2013 Jan 31;9(1):e1003160. doi: 10.1371/journal.ppat.1003160 (PMC3561209; doi:10.1371/journal.ppat.1003160)
Supplement: Table S5 — Classification of the putative Ire1-repressed genes. (XLSX) [file ppat.1003160.s011.xlsx]

## Sheet: Sheet1
Table S5. Classification of the putative Ire1-repressed genes
Process
GOID	GO_term	Cluster frequency	Background frequency	Corrected P-value	Gene(s) annotated to the term	Directly Annotated GOID List
43413	macromolecule glycosylation	12 out of 33 genes, 36.4%	67 out of 5481 background genes, 1.2%	2.42e-13	CAGL0A00209g:CAGL0D05742g:CAGL0F00759g:CAGL0H07403g:CAGL0I04532g:CAGL0J08734g:CAGL0L01243g:CAGL0L02365g:CAGL0L07172g:CAGL0L07216g:CAGL0L12804g:CAGL0M05489g	45861:44117:32:36168:36178:36180:35269:6491:71937:30447:7049:31589:752:6493:9272:6486:9267:71216:71712:44011:18279:51834:34605:6487:36187:31505:7160:16337:36170:70317:35690:9405:36244:32527
6486	protein glycosylation	12 out of 33 genes, 36.4%	67 out of 5481 background genes, 1.2%	2.42e-13	CAGL0A00209g:CAGL0D05742g:CAGL0F00759g:CAGL0H07403g:CAGL0I04532g:CAGL0J08734g:CAGL0L01243g:CAGL0L02365g:CAGL0L07172g:CAGL0L07216g:CAGL0L12804g:CAGL0M05489g	45861:44117:32:36168:36178:36180:35269:6491:71937:30447:7049:31589:752:6493:9272:6486:71216:9267:71712:44011:51834:18279:34605:6487:36187:31505:7160:36170:16337:70317:35690:9405:36244:32527
70085	glycosylation	12 out of 33 genes, 36.4%	68 out of 5481 background genes, 1.2%	2.93e-13	CAGL0A00209g:CAGL0D05742g:CAGL0F00759g:CAGL0H07403g:CAGL0I04532g:CAGL0J08734g:CAGL0L01243g:CAGL0L02365g:CAGL0L07172g:CAGL0L07216g:CAGL0L12804g:CAGL0M05489g	45861:44117:32:36168:36178:36180:35269:6491:71937:30447:7049:31589:752:6493:9272:6486:71216:9267:71712:44011:51834:18279:34605:6487:36187:31505:7160:36170:16337:70317:35690:9405:36244:32527
9100	glycoprotein metabolic process	12 out of 33 genes, 36.4%	70 out of 5481 background genes, 1.3%	4.25e-13	CAGL0A00209g:CAGL0D05742g:CAGL0F00759g:CAGL0H07403g:CAGL0I04532g:CAGL0J08734g:CAGL0L01243g:CAGL0L02365g:CAGL0L07172g:CAGL0L07216g:CAGL0L12804g:CAGL0M05489g	45861:44117:32:36168:36178:36180:35269:6491:71937:30447:7049:31589:752:6493:9272:6486:71216:9267:71712:44011:51834:18279:34605:6487:36187:31505:7160:36170:16337:70317:35690:9405:36244:32527
9101	glycoprotein biosynthetic process	12 out of 33 genes, 36.4%	70 out of 5481 background genes, 1.3%	4.25e-13	CAGL0A00209g:CAGL0D05742g:CAGL0F00759g:CAGL0H07403g:CAGL0I04532g:CAGL0J08734g:CAGL0L01243g:CAGL0L02365g:CAGL0L07172g:CAGL0L07216g:CAGL0L12804g:CAGL0M05489g	45861:44117:32:36168:36178:36180:35269:6491:71937:30447:7049:31589:752:6493:9272:6486:71216:9267:71712:44011:51834:18279:34605:6487:36187:31505:7160:36170:16337:70317:35690:9405:36244:32527
6493	protein O-linked glycosylation	7 out of 33 genes, 21.2%	15 out of 5481 background genes, 0.3%	1.9e-10	CAGL0F00759g:CAGL0H07403g:CAGL0J08734g:CAGL0L01243g:CAGL0L07172g:CAGL0L07216g:CAGL0M05489g	45861:44117:32:36178:35269:6491:71937:30447:31589:752:6493:9272:9267:71712:44011:51834:36187:31505:7160:36170:16337:35690:9405:36244:32527
5975	carbohydrate metabolic process	15 out of 33 genes, 45.5%	250 out of 5481 background genes, 4.6%	5.3e-10	CAGL0A00209g:CAGL0D05742g:CAGL0F00759g:GAS4:CAGL0G00220g:CAGL0H07403g:CAGL0I04532g:CAGL0J08734g:CAGL0L01243g:CAGL0L02365g:CAGL0L07172g:CAGL0L07216g:CAGL0L12804g:CAGL0M05489g:GAS2	45861:32:44117:44406:36168:36178:5975:36180:35269:34407:6491:71937:30447:7049:31589:752:6493:9272:6486:71216:9267:71712:902:44011:71940:6342:7163:51834:18279:34605:6487:36187:31505:7160:36170:16337:70317:35690:9405:36244:32527
1901137	carbohydrate derivative biosynthetic process	12 out of 33 genes, 36.4%	126 out of 5481 background genes, 2.3%	6.36e-10	CAGL0A00209g:CAGL0D05742g:CAGL0F00759g:CAGL0H07403g:CAGL0I04532g:CAGL0J08734g:CAGL0L01243g:CAGL0L02365g:CAGL0L07172g:CAGL0L07216g:CAGL0L12804g:CAGL0M05489g	45861:44117:32:36168:36178:36180:35269:6491:71937:30447:7049:31589:752:6493:9272:6486:71216:9267:71712:44011:51834:18279:34605:6487:36187:31505:7160:36170:16337:70317:35690:9405:36244:32527
1901135	carbohydrate derivative metabolic process	13 out of 33 genes, 39.4%	216 out of 5481 background genes, 3.9%	2.31e-08	CAGL0A00209g:CAGL0D05742g:CAGL0F00759g:CAGL0H07403g:CAGL0I04532g:CAGL0J08734g:CAGL0L01243g:CAGL0L02365g:CAGL0L07172g:CAGL0L07216g:CAGL0L11506g:CAGL0L12804g:CAGL0M05489g	45861:44117:32:36168:36178:36180:35269:6491:15936:71937:30447:6696:7049:31589:752:6493:9272:6486:71216:55114:9267:71712:44011:8299:51834:18279:34605:6487:36187:31505:7160:36170:16337:70317:35690:9405:36244:32527
71704	organic substance metabolic process	13 out of 33 genes, 39.4%	222 out of 5481 background genes, 4.1%	3.27e-08	CAGL0A00209g:CAGL0D05742g:CAGL0F00759g:CAGL0H07403g:CAGL0I04532g:CAGL0J08734g:CAGL0L01243g:CAGL0L02365g:CAGL0L07172g:CAGL0L07216g:CAGL0L11506g:CAGL0L12804g:CAGL0M05489g	45861:44117:32:36168:36178:36180:35269:6491:15936:71937:30447:6696:7049:31589:752:6493:9272:6486:71216:55114:9267:71712:44011:8299:51834:18279:34605:6487:36187:31505:7160:36170:16337:70317:35690:9405:36244:32527
6412	translation	17 out of 33 genes, 51.5%	563 out of 5481 background genes, 10.3%	6.37e-07	CAGL0A00209g:CAGL0D05742g:CAGL0F00759g:EFB1:CAGL0H07403g:CAGL0I04532g:CAGL0J08734g:RPL16A:CAGL0L01243g:CAGL0L02365g:CAGL0L07172g:CAGL0L07216g:CAGL0L10164g:CAGL0L12804g:CAGL0M02849g:CAGL0M05489g:CAGL0M13893g	45861:44117:32:36168:36178:36180:6413:35269:6491:6414:71937:30447:28:7049:31589:752:6493:447:9272:6486:71216:9267:71712:44011:2181:6412:461:51834:18279:34605:6487:36187:6415:31505:6407:7160:36170:16337:70317:35690:9405:36244:32527
6487	protein N-linked glycosylation	6 out of 33 genes, 18.2%	32 out of 5481 background genes, 0.6%	5.02e-06	CAGL0A00209g:CAGL0D05742g:CAGL0H07403g:CAGL0L02365g:CAGL0L12804g:CAGL0M05489g	32:36168:36180:35269:6491:30447:7049:6493:71216:51834:18279:34605:6487:31505:7160:16337:70317:35690:9405
Function
GOID	GO_term	Cluster frequency	Background frequency	Corrected P-value	Gene(s) annotated to the term	Directly Annotated GOID List
16757	transferase activity, transferring glycosyl groups	12 out of 33 genes, 36.4%	93 out of 5481 background genes, 1.7%	3.06e-12	CAGL0A00209g:CAGL0D05742g:CAGL0F00759g:CAGL0H07403g:FUR1:CAGL0I04532g:CAGL0J08734g:CAGL0L02365g:CAGL0L07172g:CAGL0L07216g:CAGL0L12804g:CAGL0M05489g	4169:9:26:4579:46982:4845:16888:4377:30
16758	transferase activity, transferring hexosyl groups	11 out of 33 genes, 33.3%	75 out of 5481 background genes, 1.4%	9.44e-12	CAGL0A00209g:CAGL0D05742g:CAGL0F00759g:CAGL0H07403g:CAGL0I04532g:CAGL0J08734g:CAGL0L02365g:CAGL0L07172g:CAGL0L07216g:CAGL0L12804g:CAGL0M05489g	4169:9:26:4579:46982:4377:16888:30
30	mannosyltransferase activity	8 out of 33 genes, 24.2%	37 out of 5481 background genes, 0.7%	9.95e-10	CAGL0F00759g:CAGL0H07403g:CAGL0I04532g:CAGL0J08734g:CAGL0L07172g:CAGL0L07216g:CAGL0L12804g:CAGL0M05489g	4169:9:26:46982:4377:16888:30
4169	dolichyl-phosphate-mannose-protein mannosyltransferase activity	3 out of 33 genes, 9.1%	4 out of 5481 background genes, 0.1%	3.32e-05	CAGL0F00759g:CAGL0J08734g:CAGL0L07216g	4169:46982:16888
16740	transferase activity	14 out of 33 genes, 42.4%	668 out of 5481 background genes, 12.2%	0.00051	CAGL0A00209g:CAGL0D05742g:CAGL0F00759g:CAGL0G00220g:CAGL0H07403g:FUR1:CAGL0I04532g:CAGL0J08734g:CAGL0L02365g:CAGL0L07172g:CAGL0L07216g:CAGL0L12804g:CAGL0M05489g:GAS2	4169:43169:9:26:42973:4579:46982:4845:4377:16888:30:42124
4576	oligosaccharyl transferase activity	3 out of 33 genes, 9.1%	9 out of 5481 background genes, 0.2%	0.00068	CAGL0A00209g:CAGL0D05742g:CAGL0L02365g	4579
4579	dolichyl-diphosphooligosaccharide-protein glycotransferase activity	3 out of 33 genes, 9.1%	9 out of 5481 background genes, 0.2%	0.00068	CAGL0A00209g:CAGL0D05742g:CAGL0L02365g	4579
26	alpha-1,2-mannosyltransferase activity	3 out of 33 genes, 9.1%	11 out of 5481 background genes, 0.2%	0.00133	CAGL0H07403g:CAGL0I04532g:CAGL0M05489g	26:4377:30
component
GOID	GO_term	Cluster frequency	Background frequency	Corrected P-value	Gene(s) annotated to the term	Directly Annotated GOID List
5783	endoplasmic reticulum	14 out of 33 genes, 42.4%	464 out of 5481 background genes, 8.5%	1.13e-05	CAGL0A00209g:NCP1:CAGL0D05742g:EUG1:CAGL0H07403g:CAGL0J08734g:CAGL0J11770g:CAGL0L01243g:CAGL0L02365g:CAGL0L07216g:CAGL0L11506g:CAGL0L12804g:CAGL0L13244g:ECM33	8250:9986:5829:5789:139:5739:31965:5783:1950:5794:46658:30134:136:5635:16021:5886:5792:31502:9277:5801:5634:5624:30445:5576:30446:5741
16020	membrane	19 out of 33 genes, 57.6%	1216 out of 5481 background genes, 22.2%	0.00083	CAGL0A00209g:CAGL0B01683g:NCP1:CAGL0D05742g:CAGL0F00759g:CAGL0G02453g:CAGL0H07403g:CAGL0J08734g:CAGL0J11770g:CAGL0L01243g:CAGL0L02365g:CAGL0L07172g:CAGL0L07216g:CAGL0L11506g:CAGL0L12804g:CAGL0L13244g:ECM33:CAGL0M05489g:GAS2	8250:9986:5789:139:31965:1950:46658:324:30134:136:30427:329:16021:5621:5886:5887:30445:30446:5829:936:5783:5739:5794:5635:5792:31502:9277:16020:5634:5801:5624:43188:34399:5576:45121:5741
5624	membrane fraction	8 out of 33 genes, 24.2%	188 out of 5481 background genes, 3.4%	0.00085	NCP1:GAS4:CAGL0G02453g:TIF1:CAGL0J08734g:CAGL0J11770g:ECM33:GAS2	9986:31965:1950:46658:324:30134:30427:5621:5886:5887:30445:30446:5829:936:5739:5783:5794:5792:31502:9277:5634:5624:43188:34399:5576:45121:5741:16281
5626	insoluble fraction	8 out of 33 genes, 24.2%	189 out of 5481 background genes, 3.4%	0.00089	NCP1:GAS4:CAGL0G02453g:TIF1:CAGL0J08734g:CAGL0J11770g:ECM33:GAS2	9986:31965:1950:46658:324:30134:30427:5621:5886:5887:30445:30446:5829:936:5739:5783:5794:5792:31502:9277:5634:5624:43188:34399:5576:45121:5741:16281
8250	oligosaccharyltransferase complex	3 out of 33 genes, 9.1%	9 out of 5481 background genes, 0.2%	0.00127	CAGL0A00209g:CAGL0D05742g:CAGL0L02365g	8250:16021:5886:5635
31226	intrinsic to plasma membrane	4 out of 33 genes, 12.1%	29 out of 5481 background genes, 0.5%	0.00181	CAGL0G02453g:CAGL0J11770g:ECM33:GAS2	9986:1950:46658:324:30134:30427:5886:5621:5887:30445:30446:5829:936:5739:5783:5794:9277:5634:5624:43188:34399:5576:45121
31225	anchored to membrane	3 out of 33 genes, 9.1%	11 out of 5481 background genes, 0.2%	0.00247	CAGL0J11770g:ECM33:GAS2	9986:1950:46658:30134:30427:5886:5621:30445:30446:5829:936:5739:5783:5794:9277:5634:43188:34399:5576:45121
31501	mannosyltransferase complex	3 out of 33 genes, 9.1%	11 out of 5481 background genes, 0.2%	0.00247	CAGL0J08734g:CAGL0L07216g:CAGL0L12804g	31965:136:5886:5783:31502:5801:5624
46658	anchored to plasma membrane	3 out of 33 genes, 9.1%	11 out of 5481 background genes, 0.2%	0.00247	CAGL0J11770g:ECM33:GAS2	9986:1950:46658:30134:30427:5886:5621:30445:30446:5829:936:5739:5783:5794:9277:5634:43188:34399:5576:45121
5886	plasma membrane	10 out of 33 genes, 30.3%	365 out of 5481 background genes, 6.7%	0.00274	CAGL0A00209g:CAGL0D05742g:CAGL0G02453g:CAGL0J08734g:CAGL0J11770g:CAGL0L02365g:CAGL0L07216g:CAGL0L11506g:ECM33:GAS2	8250:9986:5789:31965:1950:46658:324:30134:30427:16021:5621:5886:5887:30445:30446:5829:936:5739:5783:5794:5635:9277:31502:5634:5624:43188:34399:5576:45121
